# Supplementary material for: Modeling APC mutagenesis and familial adenomatous polyposis using human iPS cells
Source: PLoS One. 2018 Jul 19;13(7):e0200657. doi: 10.1371/journal.pone.0200657 (PMC6053155; doi:10.1371/journal.pone.0200657)
Supplement: S3 Table — Top genes sorted by FDR and called as significantly differentially expressed when meeting thresholds of p value<0.05. (XLSX) [file pone.0200657.s008.xlsx]

## Sheet: Sheet1
S3 Table. Complete list of genes that are dysregulated in APC+/+ vs APC+/- iPSC before (blue) and after (red) differentiation into HIOs.
Top genes sorted by FDR and called as significantly differentially expressed when meeting thresholds of p value<0.05.
	hiPSC - Mut vs. WT						hIOs - Mut vs. WT
	GENE_ID	logFC	logCPM	PValue	FDR		GENE_ID	logFC	logCPM	PValue	FDR
	CCDC152	-6.49694	6.71387	5.11165e-64	1.22143e-59		FABP1	6.59305	11.3048	6.64281e-209	1.5873e-204
	A2M	3.21901	7.16792	9.82824e-59	1.17423e-54		LGALS4	6.64641	5.29237	2.90246e-204	3.46771e-200
	ZNF280D	-6.07283	3.97946	1.67983e-54	1.33798e-50		APOA2	5.98814	6.34275	3.52053e-174	2.8041e-170
	RWDD2B	-5.49625	3.97695	1.82447e-50	1.08989e-46		AFP	4.58267	10.6762	2.89812e-152	1.73126e-148
	COL3A1	2.05028	9.78639	8.71382e-40	4.16434e-36		TSPAN8	3.77814	11.6039	5.9834e-146	2.85947e-142
	ZNF680	-5.55066	3.42333	1.37616e-38	5.48055e-35		SRI	2.88116	8.01835	6.93645e-97	2.76244e-93
	ZNF268	2.33851	3.48597	2.11182e-30	7.20884e-27		ALDH1A1	2.32354	8.09929	1.62728e-94	5.55484e-91
	ZNF84	2.46442	4.31419	7.70877e-30	2.30251e-26		MGST1	1.73058	9.80522	9.06022e-94	2.70617e-90
	ZNF140	5.85375	2.47981	4.59913e-28	1.22107e-24		CLRN3	5.47811	4.01914	1.85976e-92	4.93765e-89
	ZNF605	6.22605	3.12145	2.52984e-27	6.04504e-24		MRS2	-4.63275	5.87475	3.02649e-89	7.23181e-86
	LLPH	-0.998947	6.50384	1.34792e-24	2.92804e-21		CKB	3.30546	5.65304	5.35363e-88	1.16296e-84
	SCGB3A2	2.46427	4.87609	2.42941e-23	4.83757e-20		KRT8	2.6418	6.97307	1.1662e-85	2.32219e-82
	SPINK5	4.16712	4.43039	1.98859e-22	3.65518e-19		CDH17	5.73429	8.05694	8.39688e-85	1.54341e-81
	ZNF300	7.68212	2.31313	5.51624e-22	9.41503e-19		NTS	3.18743	9.42559	8.20623e-81	1.40063e-77
	C21orf59	-1.19159	6.02639	3.10963e-21	4.95364e-18		HIGD1A	1.43092	9.10384	7.09556e-77	1.13032e-73
	RBMS3	2.68922	5.78466	1.02073e-19	1.52439e-16		LGALS3	3.35938	6.8923	1.72208e-76	2.57182e-73
	S100A6	-1.31929	8.00096	2.21675e-19	3.11583e-16		CEACAM6	3.02894	8.97788	1.81989e-73	2.55802e-70
	PDGFA	1.61949	5.51697	2.06503e-18	2.74133e-15		TDP2	2.97042	7.32477	2.74688e-73	3.64648e-70
	ACTA2	1.52116	6.72851	1.46904e-16	1.84752e-13		GUCY2C	6.67317	4.96769	3.4687e-73	4.36235e-70
	ZNF248	-4.90122	2.43598	5.15272e-15	6.15622e-12		KRT18	2.59111	6.34655	1.96857e-69	2.35195e-66
	RABGAP1L	-1.11293	6.3822	6.973e-15	7.93428e-12		AKAP12	-2.4232	7.53511	3.67076e-67	4.1768e-64
	COL5A2	1.75143	6.0241	1.28383e-14	1.39442e-11		WFDC2	-4.01504	4.13627	2.19155e-66	2.38033e-63
	ANXA1	1.1364	7.3706	1.40624e-14	1.46097e-11		C15orf48	4.01599	8.02518	8.28117e-66	8.60341e-63
	LOC440173	2.21737	3.80459	1.78695e-14	1.77913e-11		MTTP	4.53072	6.6826	1.62658e-63	1.61946e-60
	LPAR6	1.4568	5.99269	3.19828e-14	3.05692e-11		HMGCS2	3.76469	5.74471	5.76615e-61	5.51129e-58
	CEBPZ	-0.703947	9.55519	4.66872e-14	4.29073e-11		GSTA1	5.10893	3.90625	1.29311e-60	1.18842e-57
	LINC00669	-5.93861	1.85051	1.31501e-13	1.16379e-10		REG4	3.99967	7.5624	2.30498e-60	2.03991e-57
	NR2F1	2.92194	3.23096	1.41212e-13	1.20509e-10		PHGR1	6.90664	2.91423	5.51803e-59	4.70905e-56
	SEMA3C	1.91742	5.75637	4.15256e-13	3.42157e-10		S100A10	1.85367	7.36726	2.06964e-58	1.70531e-55
	FABP3	-1.09041	7.32156	4.57894e-13	3.64712e-10		DCDC2	-4.09145	5.47284	1.92665e-57	1.53458e-54
	TNFRSF11B	3.09799	4.3766	5.47733e-13	4.22196e-10		MYO1A	7.08346	3.09887	3.2529e-57	2.50736e-54
	TERF1	-0.931384	10.8192	4.06514e-12	3.03551e-09		SPP1	-2.87027	9.99443	3.70889e-57	2.7695e-54
	NKAIN2	2.9754	2.79398	4.38434e-12	3.17466e-09		KRT20	5.82777	4.88618	3.98712e-57	2.88703e-54
	ANXA2	0.663053	9.16151	6.61476e-12	4.64881e-09		LOC100506421	-5.82878	6.31387	7.15797e-57	5.03058e-54
	ANKRD1	1.33941	6.13988	1.10957e-11	7.57521e-09		KCNJ16	-3.8919	4.39834	3.47005e-56	2.36906e-53
	LOC100506421	2.24167	6.31387	2.22116e-11	1.47429e-08		IDH1	1.11855	9.77956	4.42369e-56	2.93622e-53
	TUBB2B	1.053	5.22313	2.37227e-11	1.53204e-08		DKK1	-3.49808	4.11598	1.66599e-55	1.07592e-52
	GNG11	1.70483	5.04084	2.65717e-11	1.67087e-08		CADM1	-2.65751	4.93432	2.93729e-55	1.84701e-52
	ZNF311	-4.64677	1.75174	4.33975e-11	2.65893e-08		HSD17B2	2.75446	5.09395	8.74311e-53	5.35684e-50
	SSFA2	1.81834	5.41828	5.70297e-11	3.40681e-08		ISX	6.86275	2.47014	9.2687e-53	5.53689e-50
	SNRNP25	-1.78818	3.45811	6.61777e-11	3.85687e-08		TFF3	4.82212	9.08177	5.92687e-52	3.45421e-49
	HOXA3	3.66452	4.53372	1.04405e-10	5.93992e-08		EMX2	-6.16898	3.02671	7.28199e-52	4.14293e-49
	TUBB2A	1.58179	3.36961	1.47446e-10	8.19353e-08		TSPAN1	2.79173	7.54523	1.07783e-51	5.98948e-49
	POLR3K	-0.973479	4.57396	1.55656e-10	8.45317e-08		PLIN2	1.97743	8.03389	2.29971e-51	1.2489e-48
	ABCA1	-0.981631	5.29612	1.78923e-10	9.50082e-08		GCNT3	3.09266	5.83501	3.58085e-51	1.90143e-48
	RPL22L1	-0.695633	7.36236	1.91536e-10	9.94946e-08		GPRC5A	3.01027	6.16469	5.49724e-51	2.85558e-48
	UGP2	-0.512405	8.81988	3.01769e-10	1.53421e-07		SOX4	-0.828649	10.1158	9.66431e-51	4.91338e-48
	MRPS21	0.500203	8.51212	4.26434e-10	2.09716e-07		LAMA1	-4.28127	4.58376	3.52898e-50	1.75677e-47
	NR2F2	1.34186	6.21364	4.30053e-10	2.09716e-07		PRSS2	2.80823	4.78294	5.29771e-50	2.58344e-47
	TFPI	1.31472	6.58272	5.59199e-10	2.67241e-07		HEPH	5.12325	5.48881	4.72521e-49	2.25818e-46
	TSPAN8	0.895964	11.6039	1.13714e-09	5.32783e-07		CEACAM5	3.60029	7.62846	7.21988e-49	3.38272e-46
	ZNF891	6.26732	1.4967	1.20512e-09	5.53776e-07		TTR	4.89557	8.08181	7.64616e-48	3.51356e-45
	SCG5	-0.94464	6.14018	2.13467e-09	9.62412e-07		FXYD3	2.5409	9.23919	2.77121e-47	1.2494e-44
	CP	1.6658	5.38819	2.19107e-09	9.69547e-07		DHRS9	5.39764	3.72259	1.33609e-45	5.91221e-43
	ECI2	-0.44619	8.13446	2.32576e-09	1.01044e-06		HLA-DMB	-4.03162	3.89523	1.39037e-44	6.04054e-42
	EPHA7	1.38886	4.99729	2.60053e-09	1.10964e-06		MAL	-4.91236	3.34771	2.1786e-43	9.29601e-41
	VIM	0.825689	9.32429	3.81944e-09	1.60115e-06		TFRC	2.03684	6.19154	3.53829e-43	1.48329e-40
	FST	1.59888	3.75883	6.03649e-09	2.48693e-06		TMBIM6	0.972219	10.5349	7.43781e-43	3.06425e-40
	OTX2	-0.854446	5.37096	1.05677e-08	4.2799e-06		CDH6	-2.6459	5.90572	1.37903e-42	5.58505e-40
	ZNF844	-4.58074	1.65381	1.4903e-08	5.93512e-06		SLC26A3	7.43315	2.36882	3.33784e-42	1.3293e-39
	BMP4	2.53491	3.0294	1.82287e-08	7.14057e-06		APOA1	3.977	3.19438	1.63439e-41	6.40226e-39
	LRRC69	2.8921	3.46048	1.89957e-08	7.32099e-06		SLC17A4	4.93702	4.4595	6.02449e-41	2.32186e-38
	FABP1	1.03227	11.3048	2.58389e-08	9.80032e-06		CD9	1.73679	7.03982	1.20802e-40	4.58185e-38
	TNS3	1.86507	3.15301	3.17399e-08	1.18504e-05		COX6A1	1.0825	7.60765	5.07922e-40	1.89638e-37
	EMC4	0.84313	5.82844	3.37565e-08	1.24094e-05		APOBEC1	5.39224	3.19275	5.66793e-40	2.08362e-37
	CXCL5	-2.25473	2.43224	4.00927e-08	1.45154e-05		GPA33	5.52553	2.97734	1.31741e-39	4.76962e-37
	PLCB1	1.68492	4.75332	4.23879e-08	1.51173e-05		HTRA1	-5.24057	5.23945	6.80308e-39	2.42626e-36
	TMSB15A	0.803179	7.00861	4.35332e-08	1.52974e-05		ZNF280D	-5.55086	3.97946	3.32156e-38	1.16719e-35
	CEACAM6	1.38199	8.97788	4.92314e-08	1.7049e-05		B2M	1.04894	12.0988	4.48407e-38	1.55285e-35
	VCAN	0.598751	8.20462	5.36725e-08	1.83215e-05		AKAP7	4.0359	6.4839	2.49189e-35	8.50625e-33
	GJA1	0.573592	7.12506	6.26045e-08	2.10695e-05		RWDD2B	-5.39719	3.97695	4.21849e-35	1.41973e-32
	LUM	1.00477	10.5384	7.03869e-08	2.33597e-05		RPS27L	0.997709	9.78542	1.50389e-34	4.99104e-32
	MYL12A	0.38662	8.80485	7.25078e-08	2.37339e-05		SERPINB1	1.96498	7.02634	1.56394e-34	5.11923e-32
	SP140L	1.43676	4.65795	8.26924e-08	2.67018e-05		CALML4	3.05519	4.94597	1.94934e-34	6.29453e-32
	FLRT3	1.36115	5.65817	9.2296e-08	2.94055e-05		HSP90B1	0.777324	10.2102	2.07812e-34	6.6209e-32
	LINC-ROR	2.94242	1.9629	9.69204e-08	3.04726e-05		ADAM18	-6.26842	2.12909	8.62759e-34	2.71258e-31
	ADH5	0.469335	9.33482	1.15143e-07	3.57317e-05		ANXA13	4.36351	4.32773	2.04954e-33	6.36024e-31
	RPLP1	1.17824	11.0942	1.22357e-07	3.70528e-05		UCHL1	-1.76665	6.90227	3.14158e-33	9.62412e-31
	TMSB4Y	-1.67804	4.39167	1.22501e-07	3.70528e-05		FKBP14	1.71928	5.50601	3.58231e-33	1.08354e-30
	C8orf4	2.1623	4.444	1.33022e-07	3.94638e-05		LOC440173	5.06259	3.80459	4.51807e-33	1.34949e-30
	ZNF10	4.98809	1.62632	1.33776e-07	3.94638e-05		SLC51A	5.74784	3.22898	1.4181e-32	4.18338e-30
	MIR100HG	2.01938	5.48869	1.41963e-07	4.13685e-05		LCN15	5.44906	3.74016	2.36654e-32	6.89614e-30
	STMN2	2.07784	4.1511	1.45245e-07	4.18149e-05		TM4SF4	3.91864	6.46735	3.55386e-32	1.02313e-29
	CDH6	0.911939	5.90572	1.56114e-07	4.44089e-05		OAS1	2.57903	3.52044	1.40009e-31	3.98275e-29
	SP5	4.32779	0.687262	2.08397e-07	5.85841e-05		UTRN	-1.93026	7.47677	3.1197e-31	8.77001e-29
	ZNF649	-1.8859	3.68377	2.25999e-07	6.27937e-05		VIM	-1.62668	9.32429	1.59186e-30	4.42297e-28
	GSTM3	0.713986	7.41037	2.34431e-07	6.43877e-05		GPX2	1.30052	7.09006	2.90495e-30	7.97859e-28
	AASS	-0.678902	7.12197	2.80113e-07	7.60601e-05		PCP4	-3.21994	3.84855	1.24739e-29	3.3871e-27
	CGNL1	-0.812996	5.22599	4.22813e-07	0.000112308		MGST2	1.42128	7.11101	2.18539e-29	5.86741e-27
	EPHA4	1.0874	5.35815	4.23005e-07	0.000112308		AGR3	1.7031	5.74694	8.9264e-29	2.36996e-26
	PPP3CA	-0.652251	6.84874	4.44035e-07	0.000116596		LOC100505876	1.58942	5.42497	9.49388e-29	2.49292e-26
	ZNF26	5.02273	0.986012	5.23491e-07	0.000135965		FMO1	-3.90669	2.83499	1.11595e-28	2.89843e-26
	DHRS3	-1.20581	3.92647	5.76437e-07	0.000148107		SERPINB6	1.82163	5.83475	2.20852e-28	5.67446e-26
	RIN2	1.53073	3.61682	5.91751e-07	0.000150424		GPR128	5.37562	2.94433	8.39288e-28	2.13349e-25
	ARL4A	0.698651	6.80777	6.04133e-07	0.000151955		ZNF268	3.8546	3.48597	9.11231e-28	2.29199e-25
	REG1A	2.13399	3.19503	6.87776e-07	0.000171192		MUC13	4.47903	4.75496	2.06577e-27	5.14183e-25
	YBX1	0.364931	9.21846	7.80233e-07	0.000191497		PPARG	2.25641	6.35635	5.95329e-27	1.46653e-24
	ARID5B	1.05011	7.13414	7.85382e-07	0.000191497		PLEKHA1	-2.05633	5.59408	7.09239e-27	1.72931e-24
	NOP10	0.44737	9.05925	8.42536e-07	0.000203358		ALDOB	4.31505	3.38746	1.00132e-26	2.41683e-24
	CDH2	0.760793	5.18477	1.01592e-06	0.000237738		SAT1	-1.18932	9.56383	1.69389e-26	4.04755e-24
	SPINK1	0.648441	10.6839	1.02926e-06	0.000237738		PARM1	2.74118	5.4702	2.61659e-26	6.19044e-24
	TARP	2.20901	1.83591	1.04169e-06	0.000237738		ACE2	4.39326	3.79266	3.88354e-26	9.09776e-24
	MYOF	1.53708	4.78226	1.04206e-06	0.000237738		TUBB2B	-2.23718	5.22313	5.63613e-26	1.30753e-23
	C14orf1	-0.554163	6.7799	1.04318e-06	0.000237738		CTSV	1.62144	7.23902	1.11934e-25	2.57179e-23
	MEIS1	2.69842	3.35216	1.04468e-06	0.000237738		UBE2N	0.906897	7.59821	1.31887e-25	3.00136e-23
	CRABP1	0.783483	4.67917	1.15166e-06	0.000259613		TPD52	2.14898	6.07362	1.60556e-25	3.61932e-23
	IKZF2	3.67889	2.02295	1.17368e-06	0.000262104		MYLK	2.44647	4.33485	1.9063e-25	4.25712e-23
	PLAGL1	2.45915	3.07139	1.20277e-06	0.000266113		UGP2	0.90743	8.81988	2.4951e-25	5.5204e-23
	CCND1	0.729308	5.36764	1.2603e-06	0.000276282		FABP2	5.35736	2.37902	2.68634e-25	5.889e-23
	ZNF883	-1.13822	5.4405	1.38308e-06	0.000300442		MRPS21	0.885148	8.51212	3.18504e-25	6.91878e-23
	PCDHGA10	3.81913	1.58737	1.67356e-06	0.000360267		SFRP1	-1.86548	7.59128	4.454e-25	9.58813e-23
	SERPINA5	2.1585	4.21958	1.95339e-06	0.000416753		UBD	2.26679	4.79518	8.41784e-25	1.79593e-22
	SH3KBP1	0.656008	6.53365	2.28354e-06	0.000482878		PRSS1	2.93759	4.25174	9.0837e-25	1.92084e-22
	FSIP2	1.50919	4.12383	2.31661e-06	0.000485573		APOM	3.06808	4.88689	1.13297e-24	2.37476e-22
	ONECUT2	1.6699	3.98145	2.5175e-06	0.000523093		CD63	0.86983	8.42714	1.19283e-24	2.4785e-22
	HIST1H1A	-3.11671	3.18782	2.72515e-06	0.000561357		ALDH18A1	1.478	6.40996	1.40048e-24	2.88488e-22
	ZNF107	-0.964018	5.66608	2.83018e-06	0.000578009		C17orf78	7.33516	2.2631	2.29946e-24	4.6962e-22
	TSTD1	1.21857	3.4723	3.3538e-06	0.000679144		ZNF84	2.67673	4.31419	3.36701e-24	6.8182e-22
	MAP3K5	-4.2827	2.19074	3.52443e-06	0.0007077		HNF4A	2.69053	4.88546	4.22682e-24	8.48738e-22
	PLA2G4C	-1.70134	2.34341	3.64498e-06	0.000725807		PAG1	2.39325	4.86983	7.4858e-24	1.49061e-21
	ZNF33A	-0.560319	6.68073	4.0888e-06	0.000807454		ARL4C	-2.77734	4.28677	1.19254e-23	2.35502e-21
	PARM1	1.76639	5.4702	4.57354e-06	0.000895776		MGST3	0.776531	9.87857	1.33526e-23	2.61524e-21
	B3GNT7	0.944371	4.24659	4.72284e-06	0.000917498		LAMP5	-3.41947	4.7169	1.35156e-23	2.62564e-21
	EFNA2	1.71308	2.66189	5.53324e-06	0.00106626		CLDN11	-2.10768	4.58015	1.72397e-23	3.32213e-21
	COL1A2	0.896167	8.30294	5.65782e-06	0.00108155		TMEM52B	-4.23316	3.70951	1.91878e-23	3.66794e-21
	POSTN	1.3306	8.44926	5.74807e-06	0.00109008		TOB1	1.2217	5.51384	2.07401e-23	3.9332e-21
	CYR61	1.82927	2.13927	6.46168e-06	0.00121576		CCDC181	-2.44494	5.18051	2.8398e-23	5.34307e-21
	HPGD	2.85029	4.03386	6.66357e-06	0.00124228		GBA3	4.49869	2.82817	2.87818e-23	5.37298e-21
	ZNF732	-1.03184	4.22321	6.70661e-06	0.00124228		ZIC2	-2.32774	6.10111	3.17675e-23	5.88437e-21
	DYNLT1	0.373435	8.28026	7.07883e-06	0.00130114		HSD17B11	1.58913	7.47468	6.35038e-23	1.16725e-20
	PDE1A	2.54966	3.52552	7.18372e-06	0.00131034		DSC2	1.72847	5.10984	1.09563e-22	1.99849e-20
	LGI1	3.151	2.56678	7.51593e-06	0.00136055		MYL12B	0.811963	9.64393	1.5108e-22	2.73345e-20
	SCG2	2.34563	3.80796	8.36095e-06	0.00150214		IFITM1	-1.16413	5.64786	1.52144e-22	2.73345e-20
	PRTG	1.24723	4.76713	8.48403e-06	0.00151288		CIDEB	4.66561	1.86652	1.70869e-22	3.04695e-20
	SCRN1	1.47484	3.66855	8.56188e-06	0.00151545		ACSL4	-1.77302	6.01759	2.16595e-22	3.83374e-20
	CCDC80	1.04529	5.82104	9.00593e-06	0.00158233		LOC100505989	2.08784	4.2241	2.30908e-22	4.05702e-20
	AGR2	0.720595	10.3092	9.32944e-06	0.0016272		PENK	-4.98002	1.86061	3.5382e-22	6.17118e-20
	QPCT	2.23163	4.77477	1.07729e-05	0.00186534		SLCO1A2	4.50916	3.63886	3.91044e-22	6.771e-20
	ABCB1	3.02759	2.55582	1.09808e-05	0.00188767		HINT1	0.78454	9.0606	4.03959e-22	6.94431e-20
	SOX4	0.245668	10.1158	1.111e-05	0.00189624		CYP1B1	-1.65769	6.33744	5.16365e-22	8.81325e-20
	PRKG1	-0.929881	4.24696	1.16993e-05	0.00198265		APOD	1.4918	6.02935	6.5279e-22	1.10627e-19
	NQO2	0.863775	3.8731	1.1935e-05	0.00200836		FMN1	-1.98261	4.40928	1.31386e-21	2.21089e-19
	RPS18	0.408671	9.79096	1.22897e-05	0.00205358		DSG2	1.46814	5.51652	2.50139e-21	4.17977e-19
	TSPAN1	1.23479	7.54523	1.28865e-05	0.00213835		GAPDH	0.729851	8.47888	3.05485e-21	5.06914e-19
	CCDC167	0.913851	3.81432	1.36996e-05	0.00225759		RAB11FIP2	-1.61709	5.93548	3.25557e-21	5.36495e-19
	HKR1	1.77012	2.4811	1.41163e-05	0.00231034		PLAC8	1.89186	5.54326	3.68874e-21	6.03715e-19
	PLD1	3.41095	3.69633	1.43618e-05	0.00233453		SLC26A2	1.59087	7.06574	3.96104e-21	6.43871e-19
	CDH11	1.18882	4.46204	1.45069e-05	0.00234219		LIMA1	1.27157	8.99894	4.05256e-21	6.54297e-19
	HBG2	0.482511	8.9261	1.46346e-05	0.00234694		LINC00958	-2.95816	3.50284	4.20547e-21	6.74427e-19
	NUPR1	2.45106	4.48421	1.53061e-05	0.00243826		TMEM45B	2.38001	5.47393	5.31407e-21	8.46531e-19
	SPP1	0.735289	9.99443	1.5915e-05	0.00251847		KCNJ15	-6.03679	2.36538	5.81745e-21	9.20582e-19
	ALDOA	-0.51268	7.01187	1.80356e-05	0.00283526		GSTA2	5.48488	3.72615	6.05603e-21	9.52033e-19
	FBXW7	0.706065	5.21725	1.93891e-05	0.00302812		NACA	0.605375	10.5556	6.72511e-21	1.0503e-18
	BNIP3	0.993512	4.65876	1.96764e-05	0.00305303		ERBB3	1.78042	5.47296	8.21287e-21	1.27433e-18
	ZNF329	1.35455	3.19539	2.02467e-05	0.00312126		AOAH	4.7095	2.32395	8.76617e-21	1.3514e-18
	CCDC50	0.855431	4.43045	2.07229e-05	0.0031742		TRIM31	4.59698	3.37165	1.18135e-20	1.80951e-18
	COL2A1	1.09892	2.88355	2.45422e-05	0.00373525		LIX1	-3.08398	6.35558	1.34607e-20	2.04868e-18
	MT1X	-0.589169	8.86218	2.57097e-05	0.00388819		AADAC	2.31846	4.93413	1.51069e-20	2.28467e-18
	FABP7	-0.746504	10.212	2.64133e-05	0.00396941		FLJ22763	6.69086	2.33749	1.85888e-20	2.79358e-18
	EXPH5	-0.69692	4.65204	2.6579e-05	0.00396941		ERBB4	-4.75471	2.02836	3.90533e-20	5.83237e-18
	COL1A1	0.857449	7.5486	2.82667e-05	0.00419523		APOB	5.34001	2.95164	4.11063e-20	6.10084e-18
	SLC39A8	1.23502	3.23439	2.86581e-05	0.00422707		VPS29	0.84585	8.59231	4.1909e-20	6.18157e-18
	TFF1	1.09049	8.72492	3.09764e-05	0.00454099		DCBLD2	-1.33814	6.27109	6.71854e-20	9.84904e-18
	ZNF516	1.36225	2.57204	3.12415e-05	0.00455192		COL4A3	-6.49882	1.75484	7.10647e-20	1.03542e-17
	SET	-0.325133	9.92988	3.3323e-05	0.00482578		ZNF248	-6.68996	2.43598	8.41879e-20	1.21919e-17
	NPFFR2	-1.7896	2.35732	3.5221e-05	0.00506992		ARRDC3	-1.51848	6.12557	8.76909e-20	1.26227e-17
	LDHC	3.6385	1.04881	3.73051e-05	0.00533776		IQCA1	-1.72636	6.16328	9.60016e-20	1.37363e-17
	OR7E12P	-1.64923	2.25688	3.78879e-05	0.00538523		SORL1	2.18775	5.205	1.22776e-19	1.74627e-17
	CXCR4	1.70124	2.73786	3.80877e-05	0.00538523		MDM2	1.10894	7.20392	1.30495e-19	1.84507e-17
	CALB1	-1.81039	3.31064	3.89021e-05	0.00546804		CEACAM7	2.66486	5.18993	1.71117e-19	2.40519e-17
	LARP7	0.292032	10.1014	3.91996e-05	0.00547762		FAM13A	1.81819	6.95852	1.97843e-19	2.76459e-17
	CD47	0.902959	4.31353	4.07934e-05	0.00566719		NOSTRIN	2.50774	4.22931	2.36553e-19	3.2863e-17
	VMP1	0.377399	7.36712	4.27081e-05	0.0058989		NR1H4	3.56092	4.24134	2.50162e-19	3.45528e-17
	RPLP2	0.670728	8.96748	4.44249e-05	0.00606263		CP	2.32884	5.38819	4.30689e-19	5.91455e-17
	WLS	1.19122	3.68096	4.45797e-05	0.00606263		GSKIP	0.990473	8.11801	6.67785e-19	9.11813e-17
	WNK1	0.687144	6.66491	4.46546e-05	0.00606263		SMIM14	1.59606	6.88685	8.12205e-19	1.10271e-16
	SRP9	0.32625	9.91115	4.5448e-05	0.00613549		MMP1	-1.36835	5.66256	8.66776e-19	1.17015e-16
	D21S2088E	-1.31136	3.47996	4.61809e-05	0.0061994		VSIG10	1.76488	5.28896	1.13702e-18	1.52636e-16
	OBSCN	-3.65303	0.912686	4.78815e-05	0.00639177		UGT2B17	4.89306	4.08445	1.32394e-18	1.76735e-16
	TFF2	1.09588	8.97287	5.11684e-05	0.00679261		SEPP1	1.80326	4.82717	1.36863e-18	1.81686e-16
	CTGF	1.16353	3.69185	5.32646e-05	0.00700968		BMP3	-2.25865	4.37359	1.61686e-18	2.13452e-16
	SOX6	1.48441	5.05932	5.33903e-05	0.00700968		OLFM4	2.45345	4.59427	1.67291e-18	2.19638e-16
	ANKRD45	1.58069	2.80383	5.38409e-05	0.00703021		SCGN	2.93947	3.29646	1.77542e-18	2.31824e-16
	SLC2A1	1.02434	3.56003	5.47199e-05	0.00710616		MMP7	-1.89811	5.46293	2.09713e-18	2.72341e-16
	TACC1	1.17012	4.39026	5.61346e-05	0.00725047		CEACAM1	3.17301	4.23648	2.70714e-18	3.49661e-16
	SFRP1	-0.637514	7.59128	5.70882e-05	0.00733399		IRF2BPL	-1.425	6.12525	3.13835e-18	4.03177e-16
	S100A10	0.666322	7.36726	5.78812e-05	0.0073961		BTNL3	4.68037	2.34179	5.11898e-18	6.54107e-16
	ANKRD62P1-PARP4P3	2.35535	1.45179	5.81916e-05	0.00739621		SCD	0.661806	8.45628	6.37537e-18	8.10316e-16
	PHACTR3	1.98191	3.10643	5.86409e-05	0.00741388		NDUFA12	0.676371	8.98217	9.36838e-18	1.18443e-15
	ERBB4	2.91591	2.02836	5.95208e-05	0.00748552		ZNF680	-4.36538	3.42333	1.72413e-17	2.16832e-15
	ZNF486	-0.768067	4.76485	6.00377e-05	0.007511		MGAT4A	2.04202	5.18777	1.78965e-17	2.23894e-15
	BAALC	2.32992	1.4204	6.34148e-05	0.00789216		A2M	1.07416	7.16792	1.84939e-17	2.30162e-15
	GOLGB1	-0.353319	8.83952	6.43713e-05	0.0079697		PRR15L	2.57887	3.50487	2.28902e-17	2.834e-15
	LOC541471	1.1986	4.78773	6.67247e-05	0.00821849		MEP1A	5.24904	2.3152	2.52953e-17	3.11563e-15
	ADM	-1.27633	3.32744	6.73859e-05	0.00823767		FILIP1	-2.69961	5.63067	2.7618e-17	3.38427e-15
	DACH1	1.7136	3.55846	6.75699e-05	0.00823767		ZNF229	4.82502	2.74025	2.84856e-17	3.47277e-15
	SCN3A	3.01982	2.69212	7.49733e-05	0.00905548		LHX1	-6.14762	1.98275	3.90706e-17	4.73905e-15
	LINC00461	3.70925	1.75012	7.5036e-05	0.00905548		POF1B	2.83089	2.95962	4.22559e-17	5.09951e-15
	MAP3K7	0.683109	5.30521	7.75769e-05	0.00931507		SBF2	1.76275	4.56697	6.55632e-17	7.87253e-15
	SLN	3.55427	1.2915	8.00473e-05	0.00956365		ATP1B1	1.39054	5.67269	8.69143e-17	1.03841e-14
	ESRP1	-0.858869	5.04199	8.16408e-05	0.0097055		C8orf4	-2.6967	4.444	9.11906e-17	1.08408e-14
	ZNF585A	1.22538	2.76238	8.23099e-05	0.00972343		PAPPA2	-4.17767	4.07538	1.09115e-16	1.29075e-14
	BAZ2B	-0.401901	8.44114	8.27995e-05	0.00972343		AGR2	1.07406	10.3092	1.1922e-16	1.40333e-14
	MT1M	2.46973	1.68581	8.30124e-05	0.00972343		LRRC31	4.11397	2.51742	1.28585e-16	1.50615e-14
	HBG1	0.438312	8.9624	8.52373e-05	0.00993534		RNF186	5.49234	2.08744	1.45072e-16	1.69097e-14
	ZNF267	-0.651229	6.15724	8.60751e-05	0.00998429		S100A4	1.0346	9.40486	2.65465e-16	3.07927e-14
	DCX	1.04916	5.4457	9.18405e-05	0.0106016		RDH10	-1.52877	4.75293	2.74026e-16	3.16322e-14
	PLEKHA4	0.752019	5.73693	9.58336e-05	0.0110093		LGALS2	2.65422	4.04872	5.45651e-16	6.26843e-14
	WDR72	1.32107	3.74428	9.75242e-05	0.01115		TNFSF10	-2.08693	6.20342	5.75074e-16	6.55548e-14
	COL6A1	1.43236	3.89227	9.93506e-05	0.0113047		MECOM	-1.18595	5.71643	5.76125e-16	6.55548e-14
	MACC1	-0.788215	6.28119	0.000100421	0.0113723		FAM134B	2.84713	4.33623	5.947e-16	6.73476e-14
	SEMA6A	0.646148	5.41356	0.00010305	0.011615		HIPK2	-1.42935	5.23909	6.53867e-16	7.36988e-14
	MET	1.12926	3.8835	0.000105126	0.0117933		EFNA5	-1.35809	6.07703	7.18168e-16	8.05663e-14
	NDUFAF7	-0.524701	6.44293	0.000106964	0.0119435		ZNF605	5.26616	3.12145	9.59785e-16	1.07169e-13
	TMSB4X	0.278876	13.8116	0.000119033	0.0132199		SMAGP	2.06323	4.06891	9.85001e-16	1.09473e-13
	HMCN1	2.22154	2.7258	0.000119502	0.0132199		EPCAM	1.43885	6.71513	9.96518e-16	1.1024e-13
	TMCC1	-0.819433	4.83217	0.00012029	0.0132457		UPK1B	-1.18154	6.33739	1.08351e-15	1.19215e-13
	ITGB1	0.396166	7.45095	0.000124069	0.0135992		MLLT11	-0.950744	8.40279	1.08763e-15	1.19215e-13
	EBF2	2.62126	3.77039	0.000125839	0.0137303		GOLM1	1.28616	5.77863	1.25778e-15	1.37236e-13
	TSPO	2.29523	1.70913	0.000127102	0.013805		KRT19	1.3977	5.64461	1.58403e-15	1.72048e-13
	ERH	0.293815	10.1646	0.000129553	0.0140075		THBS4	4.03621	3.3865	1.72205e-15	1.86192e-13
	OAF	1.99029	2.93269	0.000130424	0.0140382		ETHE1	2.96911	3.5388	2.09388e-15	2.25376e-13
	LINC00152	2.30731	1.72859	0.000139252	0.0149212		TRIM2	0.869862	6.89896	2.36088e-15	2.52631e-13
	CCDC125	-0.818218	5.12658	0.000141484	0.0150926		LAMC2	1.75364	4.79742	2.36825e-15	2.52631e-13
	HESX1	-0.893733	3.71105	0.000145212	0.0153921		MLF1	-1.20346	6.53171	2.84943e-15	3.02452e-13
	ACTC1	0.83588	3.09013	0.000145579	0.0153921		RNF144B	-3.53952	2.88453	2.86061e-15	3.02452e-13
	ZNF439	-2.57641	1.45113	0.000148917	0.0156234		SLC11A2	1.17228	5.92849	3.11133e-15	3.27512e-13
	ZNF667	-1.94464	2.29003	0.000149088	0.0156234		MLEC	1.10287	6.19049	3.1311e-15	3.28148e-13
	LECT1	-0.676714	5.90518	0.000149729	0.0156234		SERPINA6	5.81658	1.67923	3.39184e-15	3.53921e-13
	B2M	0.309985	12.0988	0.000153761	0.0159613		ERP27	2.97497	3.31142	4.44264e-15	4.61552e-13
	UXS1	0.963706	4.49688	0.000154303	0.0159613		ALB	4.16409	4.61365	4.84556e-15	5.01232e-13
	C1orf61	2.31976	1.92767	0.000157142	0.016185		PAX8	-4.67267	2.62374	6.22189e-15	6.40827e-13
	PPP1R3B	0.644564	5.21776	0.000159591	0.0163666		MIA2	1.75945	5.44073	6.38277e-15	6.54577e-13
	EOMES	3.46273	0.769164	0.000162773	0.0166217		TMEM144	2.2197	4.28543	6.41655e-15	6.55228e-13
	DCN	0.871595	8.955	0.000167243	0.0170054		SLC9A3R1	2.12565	3.1785	7.25153e-15	7.37342e-13
	TSHZ1	3.5652	2.56673	0.000176995	0.0179208		PTPRR	3.57307	5.21379	7.39726e-15	7.48973e-13
	LIFR	1.19994	4.65046	0.000178991	0.0180463		ZNF140	4.79537	2.47981	8.88436e-15	8.95746e-13
	CENPN	0.293803	7.93217	0.000185436	0.0186077		NGFRAP1	-0.666036	7.76721	9.28156e-15	9.31861e-13
	POU3F2	1.67619	2.66469	0.000186116	0.0186077		RAB3B	0.912686	6.40019	1.10695e-14	1.10672e-12
	HEPH	1.09859	5.48881	0.000189026	0.0188199		IL2RG	3.82876	3.37367	1.24925e-14	1.24379e-12
	CPED1	1.95707	4.95658	0.000195234	0.0192826		SRSF5	0.665195	9.1132	1.25741e-14	1.24671e-12
	SYNGR1	1.44293	2.40548	0.000195288	0.0192826		LIMCH1	-2.73513	5.24137	1.37535e-14	1.35801e-12
	ZFP36L1	0.595811	6.24833	0.00019618	0.019291		THBS2	-3.26168	3.8668	1.3818e-14	1.35877e-12
	TRPC4	1.05006	3.99874	0.000206875	0.0202593		SLCO2B1	5.28052	1.06291	1.95215e-14	1.91175e-12
	NEDD9	1.22691	3.98975	0.000209069	0.0203906		FTH1	0.801019	8.10865	2.2365e-14	2.18091e-12
	BAHCC1	2.80308	1.54405	0.000220728	0.0214402		MSN	-1.42589	6.12205	2.24526e-14	2.18091e-12
	FXYD3	0.736706	9.23919	0.000222312	0.0215067		SRGAP2C	-1.13658	6.2469	3.11331e-14	3.01184e-12
	LOC100996702	1.52204	1.98231	0.000224111	0.0215928		ZNF585A	3.88916	2.76238	3.50328e-14	3.37544e-12
	MDGA2	3.21273	1.79427	0.00022501	0.0215928		SLC12A1	-7.67679	3.44481	4.54528e-14	4.36183e-12
	MGAT4C	-0.856982	3.59073	0.000235597	0.0225184		IFNGR1	1.29461	5.65977	4.74423e-14	4.53453e-12
	RAB25	-1.75571	2.51921	0.000239082	0.0227427		CDH2	-1.41534	5.18477	4.774e-14	4.54481e-12
	GYLTL1B	-2.27664	0.864118	0.000239852	0.0227427		SIAE	2.31592	4.30399	5.33034e-14	5.0543e-12
	CD99	0.929376	4.6866	0.000240799	0.0227427		A1CF	3.13576	3.37025	5.64765e-14	5.33402e-12
	PQBP1	-0.856374	4.40306	0.000242973	0.0228576		TM4SF20	4.28771	2.86186	5.76772e-14	5.42597e-12
	TMSB10	0.276269	10.299	0.000254432	0.0238418		FAM221A	-1.90813	4.85856	5.87556e-14	5.50575e-12
	SFRP4	1.98977	4.40299	0.000257429	0.0240284		SLIRP	0.559397	10.6595	6.03101e-14	5.62934e-12
	EIF3A	-0.311163	9.11299	0.000261073	0.0242737		MRPL51	0.570273	9.06711	7.3095e-14	6.79613e-12
	ANGPTL3	-4.11592	1.99176	0.000263722	0.0243537		TSPAN12	-2.55634	3.67788	8.47983e-14	7.8537e-12
	RNF20	-0.395837	7.75067	0.000263972	0.0243537		BASP1	-1.45722	4.92345	9.25596e-14	8.53943e-12
	PRDM7	2.29899	1.03885	0.000266818	0.0245216		PTP4A1	1.69283	5.0521	1.15461e-13	1.06113e-11
	DZIP1L	1.87911	1.80015	0.000270125	0.0247304		ANP32E	-0.822438	9.66572	2.05941e-13	1.88543e-11
	SLCO1A2	0.912641	3.63886	0.000275984	0.0251703		VAMP8	0.935902	6.69418	2.08656e-13	1.90299e-11
	PARD3B	-1.18964	4.42431	0.000280345	0.0254709		FREM2	-2.36913	4.1037	2.1683e-13	1.97002e-11
	SENP2	-0.653835	5.5828	0.000287444	0.0260089		TARP	4.96065	1.83591	2.22622e-13	2.01498e-11
	DBT	-0.538946	5.32845	0.000289525	0.0260089		PLS1	1.21172	6.31875	2.91688e-13	2.63015e-11
	COMMD2	0.350959	6.4055	0.000290364	0.0260089		C4BPB	5.15865	1.53663	3.09926e-13	2.78409e-11
	SNRPD2	0.236027	10.0397	0.00029062	0.0260089		MYL6	0.591251	11.0548	3.36807e-13	3.01424e-11
	MTIF2	-0.409582	6.81243	0.000294578	0.0261847		PERP	1.37354	6.6217	3.83188e-13	3.41652e-11
	FKBP7	0.826379	5.66211	0.000294777	0.0261847		CYP51A1	0.638275	8.13354	3.99314e-13	3.54707e-11
	SDCBP	0.343367	8.49022	0.000295955	0.026192		TXNDC17	0.743908	7.95621	4.67296e-13	4.13557e-11
	TNC	1.63057	3.04098	0.000302659	0.0266865		MRPL42	0.532352	8.88455	4.89421e-13	4.3154e-11
	SKIDA1	0.804	4.19222	0.000305073	0.0268005		MRPL50	0.706101	7.41081	5.47819e-13	4.81255e-11
	UBE2T	0.39965	8.51218	0.000308799	0.0269631		VIL1	3.35335	2.09717	5.5154e-13	4.82037e-11
	SAGE1	-2.471	1.63991	0.000310096	0.0269631		LINC00483	3.03436	1.82768	5.52744e-13	4.82037e-11
	LOC100379224	2.13837	1.50097	0.00031031	0.0269631		SIM1	-3.04864	2.59191	5.80064e-13	5.04023e-11
	LRRN3	1.11466	4.13273	0.000314859	0.0272593		CCDC68	2.44836	3.27301	5.83575e-13	5.05237e-11
	C10orf118	-0.34172	8.4371	0.000322936	0.0278576		APOA4	5.96851	1.33568	5.95141e-13	5.1339e-11
	NAGA	1.47995	3.1403	0.000325256	0.0279568		LDHA	0.710224	9.20493	6.05394e-13	5.20356e-11
	TSC22D3	1.83458	3.2116	0.000330637	0.0283174		ANG	1.6398	5.4815	7.15436e-13	6.12736e-11
	BBS5	-3.297	1.48656	0.000334739	0.0285664		FOXD2	2.82286	2.17886	8.33571e-13	7.11364e-11
	C6orf62	-0.433729	7.51362	0.000342571	0.0291307		HOXD8	-2.01832	3.96968	8.81791e-13	7.49836e-11
	FNIP1	0.587177	4.80006	0.000346694	0.0293768		DPYSL2	0.822408	7.57741	9.89388e-13	8.38349e-11
	CEP85L	0.697873	6.0417	0.000354934	0.0299055		DAZAP2	0.745244	7.45719	1.15286e-12	9.73415e-11
	PAPLN	-0.760452	3.92371	0.000355437	0.0299055		ARHGAP24	-1.91099	3.59636	1.16042e-12	9.76347e-11
	TFF3	1.13839	9.08177	0.000364438	0.0305552		FENDRR	2.9543	1.92451	1.28465e-12	1.07708e-10
	RNASE4	1.95369	5.54626	0.000367611	0.0307135		TMEM59	0.891917	7.70895	1.55278e-12	1.29733e-10
	NCL	-0.452107	11.8194	0.000370059	0.0308103		ARL14	1.69869	4.29494	1.58551e-12	1.32006e-10
	RELL1	0.655924	5.58924	0.000386956	0.0321053		GUCA2A	5.98228	1.38223	1.623e-12	1.34659e-10
	HNRNPA2B1	-0.507117	10.4549	0.000403881	0.0333936		RPS26	0.801918	6.97864	1.69435e-12	1.40092e-10
	FKBP14	0.463686	5.50601	0.000414003	0.0341124		SLC35A3	1.41751	4.55581	1.79168e-12	1.47628e-10
	SLC9A5	-3.73857	0.623142	0.000422858	0.0345197		SLC39A5	3.02325	2.02793	1.95613e-12	1.60625e-10
	CDK17	1.40793	3.47147	0.000422887	0.0345197		RNF128	2.21648	3.80372	1.99837e-12	1.63531e-10
	SERINC5	0.632798	5.28397	0.000423279	0.0345197		HSPE1	0.592796	9.65474	2.33013e-12	1.90029e-10
	TMEM216	0.585729	4.63153	0.000427241	0.0347243		UGT2B15	1.8988	4.15575	2.44329e-12	1.9858e-10
	TFPI2	2.13593	1.64541	0.000430741	0.0347791		HKDC1	1.88385	3.29839	2.56195e-12	2.07518e-10
	FAM98A	-0.640847	6.48633	0.000430827	0.0347791		ABCC2	6.09109	1.47407	2.64413e-12	2.13451e-10
	ZNF106	-0.373902	7.37942	0.00043888	0.0353099		NEFM	-1.56767	6.21483	2.78352e-12	2.23946e-10
	CCL2	0.6568	6.81582	0.000450566	0.0358835		TSPYL5	-2.70073	3.88409	3.23912e-12	2.59727e-10
	FILIP1	-0.857099	5.63067	0.000451391	0.0358835		RPLP0	0.538014	11.2954	3.25557e-12	2.60174e-10
	RPLP0	0.269293	11.2954	0.000451945	0.0358835		CFI	-1.02336	7.94193	3.33952e-12	2.65992e-10
	CLC	0.999493	5.27635	0.000452017	0.0358835		MNS1	-1.80602	5.04013	3.4517e-12	2.74015e-10
	CRKL	-0.436598	5.73185	0.000457131	0.0361694		ANXA1	-0.914097	7.3706	3.54287e-12	2.80321e-10
	C1orf54	0.416993	5.60178	0.000461974	0.0364319		DUOX2	3.67169	2.44648	3.59209e-12	2.83277e-10
	GAPDH	-0.248507	8.47888	0.000470796	0.0370055		RERGL	3.55212	1.9247	3.60408e-12	2.83288e-10
	FGF9	2.5466	1.94255	0.000483356	0.0378682		FABP6	5.82649	2.35851	4.02873e-12	3.15628e-10
	TBC1D9	2.16018	2.96956	0.000485484	0.0379106		MPZL2	1.79025	3.2981	4.13509e-12	3.22902e-10
	LRFN5	3.56348	1.26254	0.000494389	0.0384802		ACAA2	0.86335	7.69343	4.44624e-12	3.46068e-10
	TNFAIP6	1.85007	3.92793	0.00049751	0.0385974		TMEM106C	0.87312	7.69341	4.60942e-12	3.57605e-10
	FRK	3.42043	2.93916	0.000510245	0.0393369		RPL36AL	0.447799	10.5401	4.68477e-12	3.62274e-10
	THAP10	2.25787	1.38426	0.000510334	0.0393369		PTPN13	-1.45057	5.49524	4.7424e-12	3.65547e-10
	ATHL1	-2.31097	1.4742	0.000524847	0.0403255		CALM1	0.602032	7.80162	5.01796e-12	3.85544e-10
	FREM1	2.03104	3.03357	0.000530914	0.0406609		SESN3	-1.42096	5.45319	5.05826e-12	3.87395e-10
	CCND2	0.318265	7.59852	0.000585788	0.0447201		ZNF439	-4.32135	1.45113	5.49146e-12	4.19228e-10
	IFITM1	0.406373	5.64786	0.000588014	0.0447471		AIF1L	-2.71043	2.90533	5.65396e-12	4.30259e-10
	ZNF708	-0.586528	6.01882	0.000590412	0.044787		PDCD4	1.03046	6.45481	6.10047e-12	4.62764e-10
	FN1	0.859789	6.37835	0.000596935	0.0451385		SPARC	-0.734691	8.2705	6.78723e-12	5.13231e-10
	NRIP1	0.614588	5.80556	0.000603698	0.0455059		SLC38A1	0.743303	7.94584	7.55327e-12	5.69116e-10
	CSPG5	2.91666	1.04431	0.00061686	0.0462153		SH3KBP1	0.793587	6.53365	7.57392e-12	5.69116e-10
	RPL18	0.799121	8.67177	0.000616978	0.0462153		RXFP1	-5.24628	1.49528	7.95266e-12	5.95702e-10
	ADAMTS8	-1.80872	1.75917	0.000619468	0.0462568		FCGRT	1.43503	3.98581	8.37091e-12	6.25072e-10
	TGFB2	1.9035	3.38457	0.00063579	0.0473278		CD164	0.937371	7.64384	8.44438e-12	6.28594e-10
	CYP1B1	1.198	6.33744	0.000659846	0.0489659		EFNA2	2.1378	2.66189	8.58965e-12	6.35518e-10
	PHOX2B	2.47059	0.695926	0.000685184	0.0506888		NPHP1	-2.07773	4.14979	8.59059e-12	6.35518e-10
							APOE	-1.20545	5.96468	8.88437e-12	6.55222e-10
							GALNT1	1.551	5.90882	9.31026e-12	6.84519e-10
							COL3A1	-0.778229	9.78639	9.39206e-12	6.88415e-10
							RPN2	0.631913	8.81041	1.05116e-11	7.68122e-10
							SALL1	-2.54139	3.86032	1.14703e-11	8.35616e-10
							CSTB	1.02696	5.45046	1.18916e-11	8.63677e-10
							FAM105A	2.91662	2.92117	1.22906e-11	8.89951e-10
							SLC12A2	0.818845	6.54492	1.32339e-11	9.55361e-10
							SNHG5	0.630424	10.6329	1.59564e-11	1.14843e-09
							CA1	1.67061	4.45756	1.65421e-11	1.18701e-09
							COX7A2	0.402829	10.1748	1.84427e-11	1.31943e-09
							CDKL2	-3.42131	3.77598	2.07588e-11	1.48069e-09
							CFLAR	-1.26347	4.73439	2.15535e-11	1.5328e-09
							PRIM1	1.02552	7.05365	2.24053e-11	1.58865e-09
							NDUFA9	0.798993	7.41456	2.29029e-11	1.61913e-09
							F11R	0.700891	8.00044	2.30517e-11	1.62484e-09
							ACOT13	0.950163	7.36633	2.7348e-11	1.922e-09
							GPR98	1.66862	4.90919	2.95628e-11	2.07156e-09
							ARPC3	0.785416	8.31374	2.99277e-11	2.091e-09
							TUBA1A	-0.704967	8.47031	3.29385e-11	2.29465e-09
							INO80C	2.0848	5.31251	3.45024e-11	2.39199e-09
							SLC39A14	1.72599	4.54817	3.45359e-11	2.39199e-09
							RAN	0.503026	8.84859	3.53657e-11	2.44238e-09
							IFITM2	-1.35856	4.60264	3.9729e-11	2.7358e-09
							F2	4.62543	1.313	4.27533e-11	2.9356e-09
							KIF13B	1.17773	6.32619	4.42567e-11	3.03013e-09
							MGP	-1.24934	6.1875	4.60137e-11	3.14142e-09
							ANXA3	1.04247	6.95894	4.81979e-11	3.28117e-09
							GMNN	0.936232	6.59771	5.53382e-11	3.75655e-09
							KLF5	1.58727	4.89479	5.55099e-11	3.75753e-09
							GLTPD2	3.70619	1.50301	6.06314e-11	4.09262e-09
							EID1	-0.610475	8.17492	6.20061e-11	4.17362e-09
							COL17A1	2.71649	3.3336	6.36696e-11	4.27355e-09
							HAVCR1	2.57454	2.46191	7.32118e-11	4.90027e-09
							S100A9	-3.60948	1.8899	7.52599e-11	5.02328e-09
							CD46	0.63878	8.68198	8.41524e-11	5.60118e-09
							ZNF83	-1.64125	4.09905	9.38588e-11	6.22988e-09
							ATP5J	0.440054	11.2593	9.4619e-11	6.26294e-09
							CLDN10	-2.69406	3.21304	1.02799e-10	6.78559e-09
							FOXC1	-2.09458	2.96493	1.07436e-10	7.07214e-09
							SAGE1	-5.72983	1.63991	1.16505e-10	7.64805e-09
							ACSL5	1.95267	3.62312	1.45227e-10	9.50742e-09
							C7	-1.91065	4.20063	1.45928e-10	9.52716e-09
							VSNL1	-2.44765	4.78751	1.49932e-10	9.76195e-09
							CNPY2	0.723168	6.70792	1.55546e-10	1.00999e-08
							UQCR10	0.361796	10.4988	1.72413e-10	1.11648e-08
							LMO7	1.43768	7.52536	1.9316e-10	1.24424e-08
							ARMCX2	-1.82298	4.41843	1.93184e-10	1.24424e-08
							RBP4	4.30625	1.50012	2.02584e-10	1.30128e-08
							DBI	0.452287	10.9374	2.17344e-10	1.39234e-08
							SFRP4	-2.79601	4.40299	2.19089e-10	1.39976e-08
							ADAL	-1.47223	4.97615	2.27802e-10	1.45156e-08
							IFI44L	-2.42252	3.69508	2.50447e-10	1.59161e-08
							HSD17B12	0.876956	6.31805	2.61866e-10	1.65976e-08
							PCMTD2	-0.863904	5.90383	2.63299e-10	1.66442e-08
							ZNF22	-0.732235	7.63183	2.7118e-10	1.70972e-08
							ATP8B1	1.78867	3.64877	2.86477e-10	1.80141e-08
							SLC20A1	1.31267	5.77939	3.14646e-10	1.97335e-08
							WDR72	-2.04833	3.74428	3.15658e-10	1.97452e-08
							MAP9	-0.959806	6.81796	3.31649e-10	2.06912e-08
							ARHGEF28	-2.10881	4.07557	3.38046e-10	2.10355e-08
							VNN1	5.52574	1.79565	3.42059e-10	2.12298e-08
							CCL26	1.81102	3.97445	3.52732e-10	2.18356e-08
							MTHFD2	0.888718	8.07336	3.53796e-10	2.18449e-08
							NDNF	4.02859	1.4221	3.5719e-10	2.19975e-08
							PHACTR3	2.31977	3.10643	3.737e-10	2.29552e-08
							GHITM	0.6005	8.47687	3.85153e-10	2.35981e-08
							EMX2OS	-1.24277	3.73429	3.98684e-10	2.43646e-08
							SLC35D1	1.50097	4.58562	4.34786e-10	2.65031e-08
							PCCA	-2.74904	2.97601	4.36474e-10	2.65383e-08
							IL33	2.12678	2.5049	4.57685e-10	2.77573e-08
							ESRP1	1.32916	5.04199	4.66345e-10	2.81854e-08
							RRBP1	0.765616	5.59549	4.67103e-10	2.81854e-08
							SI	5.06143	0.94675	4.94523e-10	2.97648e-08
							SCG3	2.00184	7.77341	4.98944e-10	2.99554e-08
							CHFR	4.26949	1.86512	5.15023e-10	3.08433e-08
							CDX2	3.92384	1.40278	5.78315e-10	3.45471e-08
							PCSK1	-3.14919	2.06703	5.89304e-10	3.51158e-08
							ARHGAP29	-1.93068	5.68696	5.99441e-10	3.56309e-08
							CYP3A5	1.88464	4.30173	6.5641e-10	3.89204e-08
							C14orf105	-0.877877	5.63374	6.68624e-10	3.95465e-08
							SUCLG1	0.823748	6.65615	7.04799e-10	4.15832e-08
							TXNRD1	0.749862	7.56858	7.14507e-10	4.20521e-08
							SCP2	0.474429	8.82447	7.55002e-10	4.4274e-08
							MT1F	-1.45248	6.42067	7.55966e-10	4.4274e-08
							LIPH	1.86033	4.61069	8.78736e-10	5.13384e-08
							PNRC2	0.768962	6.38901	9.38376e-10	5.4689e-08
							CLU	-0.960021	7.7769	9.81115e-10	5.70407e-08
							C2orf72	3.58867	1.39498	1.05505e-09	6.11904e-08
							CES2	1.7137	3.76252	1.08886e-09	6.29982e-08
							TMCO1	0.491812	8.52101	1.12793e-09	6.51014e-08
							LIN28B	1.75947	6.49997	1.17877e-09	6.78715e-08
							ATP5F1	0.442126	10.4406	1.19806e-09	6.88165e-08
							LLPH	-0.649704	6.50384	1.24608e-09	7.14033e-08
							SLPI	2.44596	2.39207	1.5029e-09	8.59132e-08
							PAX2	-4.14719	1.17948	1.5617e-09	8.90617e-08
							OPRK1	1.00873	4.11005	1.60013e-09	9.10358e-08
							VDAC1	0.576368	7.61807	1.62857e-09	9.23752e-08
							SLC44A4	1.95389	3.32346	1.6314e-09	9.23752e-08
							COL4A4	-4.74768	3.70128	1.69647e-09	9.58326e-08
							ESRRG	-2.7488	2.81004	1.77197e-09	9.98613e-08
							TRIB2	-1.23437	5.0745	1.77997e-09	1.00076e-07
							ROCK2	1.11845	6.41291	2.04582e-09	1.14753e-07
							SPATS2L	0.720977	6.02653	2.09272e-09	1.17109e-07
							STMN2	2.50381	4.1511	2.10095e-09	1.17295e-07
							WNK1	1.02479	6.66491	2.19464e-09	1.2224e-07
							CPXM2	-2.52833	3.58336	2.39606e-09	1.33148e-07
							RIPPLY1	-4.47578	1.08849	2.4301e-09	1.34727e-07
							LINC00472	-5.74055	1.3454	2.47112e-09	1.36684e-07
							PLA2G12B	5.67013	1.2085	2.54607e-09	1.40504e-07
							SULT1B1	3.05078	2.92128	2.55499e-09	1.40672e-07
							SPINK1	0.69717	10.6839	2.81098e-09	1.5441e-07
							LOC100505715	3.1495	2.19017	2.82892e-09	1.54698e-07
							SQRDL	1.99652	3.19602	2.82918e-09	1.54698e-07
							LGALS14	5.07882	1.28497	2.87537e-09	1.56865e-07
							HSPD1	0.55454	11.3298	2.98463e-09	1.62455e-07
							SC5D	0.651978	8.50457	3.00677e-09	1.63288e-07
							ARID3A	1.6028	3.79786	3.14269e-09	1.70283e-07
							MARS	1.0777	5.62822	3.15173e-09	1.70386e-07
							UQCRH	0.46567	9.03453	3.22968e-09	1.74206e-07
							GPC3	-1.17608	6.23936	3.61064e-09	1.94316e-07
							COX7B	0.41524	9.0332	3.71448e-09	1.99455e-07
							RPS6	0.47001	13.7051	3.95338e-09	2.11807e-07
							PRG4	-1.46989	6.17743	4.07347e-09	2.17753e-07
							ADAMDEC1	5.55897	1.1572	4.13959e-09	2.20793e-07
							C10orf99	4.91815	0.905294	4.20247e-09	2.23648e-07
							COL4A2	-1.59909	3.68468	4.23564e-09	2.24913e-07
							CDKN1C	-1.26123	4.01534	4.46115e-09	2.36362e-07
							LRRC19	1.85372	3.31923	4.74999e-09	2.51109e-07
							IGF1	-1.38476	4.15774	4.8831e-09	2.57575e-07
							FRMD4A	-1.40003	4.74253	5.01107e-09	2.63743e-07
							KCNIP4	-3.12357	2.12235	5.11318e-09	2.68526e-07
							COL4A1	-1.21301	4.94584	5.24226e-09	2.74701e-07
							SLC25A3	0.760229	6.512	5.28019e-09	2.76083e-07
							LAMC1	-1.0936	5.22427	5.45763e-09	2.84738e-07
							ATP5G2	0.669189	8.99808	5.6258e-09	2.92873e-07
							PAPSS1	-0.852662	6.56612	5.76267e-09	2.99345e-07
							C11orf86	4.81428	1.16623	6.047e-09	3.13434e-07
							PSMD1	0.582264	8.0715	6.10249e-09	3.15626e-07
							CALM2	0.397486	12.3345	6.12245e-09	3.15974e-07
							SYNPR	3.06006	2.3808	6.40028e-09	3.29601e-07
							C4orf3	0.700448	7.51082	6.7419e-09	3.46447e-07
							HEPACAM2	4.2251	1.71641	6.81439e-09	3.4942e-07
							ZNF223	4.13269	2.45196	7.22803e-09	3.69837e-07
							IL37	4.8052	2.90294	7.46615e-09	3.81204e-07
							TRABD2A	3.49137	1.22174	7.54662e-09	3.84491e-07
							CCND1	0.83173	5.36764	8.13006e-09	4.13336e-07
							FXYD2	-4.43572	1.05137	8.16282e-09	4.1412e-07
							CCL15	4.90916	0.901094	1.0275e-08	5.20173e-07
							FOXA1	2.48719	2.68032	1.10213e-08	5.56775e-07
							PTPN3	-1.82525	4.36879	1.13128e-08	5.70293e-07
							NEDD9	-1.62094	3.98975	1.16753e-08	5.87331e-07
							APOC1	1.36316	4.78296	1.19751e-08	6.01147e-07
							ANXA2	0.505934	9.16151	1.26814e-08	6.35268e-07
							BTF3	0.462318	11.4147	1.31551e-08	6.57618e-07
							FAM46A	1.18739	4.57384	1.33983e-08	6.68374e-07
							TAC1	-4.58642	1.59453	1.38511e-08	6.89523e-07
							CNN3	-0.74639	7.66807	1.39815e-08	6.9457e-07
							HBB	1.80666	8.36488	1.45177e-08	7.19709e-07
							CCDC160	-2.40761	5.21707	1.52769e-08	7.54562e-07
							CNTNAP2	1.52857	5.75272	1.52839e-08	7.54562e-07
							FBLN1	-1.08239	4.69757	1.56858e-08	7.72808e-07
							LRRIQ1	-1.57508	5.07149	1.78315e-08	8.76714e-07
							AADACL3	5.55392	1.19005	1.98727e-08	9.7507e-07
							C1orf54	-0.794266	5.60178	2.08916e-08	1.02296e-06
							GPC4	-1.29072	4.90323	2.16301e-08	1.05696e-06
							ORMDL2	0.983508	4.94018	2.25268e-08	1.09853e-06
							SLC16A12	-3.1677	1.97597	2.27064e-08	1.10503e-06
							RPS21	1.10536	8.78558	2.33385e-08	1.13348e-06
							COX17	0.55024	7.82359	2.57774e-08	1.24939e-06
							TNMD	1.40344	5.92672	2.61896e-08	1.2668e-06
							ACPP	-2.21437	2.52663	2.64947e-08	1.27897e-06
							EFNB2	1.4354	4.20279	2.70974e-08	1.30543e-06
							CDH1	0.910593	5.49942	2.71537e-08	1.30551e-06
							SESTD1	-1.0996	5.1333	3.00848e-08	1.44353e-06
							HKR1	4.20364	2.4811	3.18663e-08	1.52594e-06
							QPCT	2.19251	4.77477	3.27536e-08	1.56529e-06
							TXN	0.453916	9.67179	3.38659e-08	1.61522e-06
							SNRPF	0.600942	8.26556	3.52602e-08	1.67837e-06
							RPLP1	1.23021	11.0942	3.56441e-08	1.69327e-06
							GJB1	2.08934	1.97512	3.59027e-08	1.70217e-06
							SERINC3	0.680655	6.97755	3.67963e-08	1.74109e-06
							FHL2	1.82305	3.54234	3.7082e-08	1.75114e-06
							IHH	3.93549	0.985006	3.77477e-08	1.77624e-06
							TSPAN6	0.462108	8.5591	3.77623e-08	1.77624e-06
							PKIB	0.642036	8.30453	3.81775e-08	1.79224e-06
							FMO5	2.02066	2.91431	3.85167e-08	1.80462e-06
							DNAJC10	-0.842618	5.79867	4.12246e-08	1.92771e-06
							TCEAL4	-0.721203	8.07198	4.34755e-08	2.029e-06
							ALG14	0.990272	5.75486	4.83903e-08	2.25373e-06
							ZFP36L2	0.763913	5.9986	4.84794e-08	2.25373e-06
							RPS16	0.448634	9.68225	4.87884e-08	2.26369e-06
							ZNF486	-1.20519	4.76485	5.08928e-08	2.35675e-06
							DST	0.835242	8.21132	5.28798e-08	2.44403e-06
							ZBBX	-2.56259	3.2234	5.32006e-08	2.45411e-06
							OS9	0.845115	5.30826	5.46252e-08	2.51497e-06
							CEBPG	1.57022	3.63829	5.61139e-08	2.57854e-06
							GALNT7	0.864573	6.24087	5.79272e-08	2.65676e-06
							NR5A2	2.89879	3.49996	5.81496e-08	2.66185e-06
							COL6A3	-0.809764	5.40913	5.88175e-08	2.68727e-06
							CPVL	-1.02806	7.40785	5.90885e-08	2.6945e-06
							TCF7L2	0.802974	5.0827	6.29236e-08	2.86392e-06
							FSTL1	-0.91309	6.04932	6.35713e-08	2.88771e-06
							POMP	0.324131	9.73371	6.3688e-08	2.88771e-06
							IGFBP7	-1.03146	3.79994	6.40094e-08	2.89679e-06
							NDRG1	1.66062	3.79502	6.45394e-08	2.91525e-06
							SPATA13	-1.06824	4.62008	6.48327e-08	2.92298e-06
							LAMA3	1.33566	5.01923	6.66491e-08	2.99921e-06
							PARP4	0.771298	6.04936	6.78522e-08	3.0448e-06
							SPRY1	-1.13119	4.35287	6.79171e-08	3.0448e-06
							TWF1	1.16529	4.86534	6.83222e-08	3.05723e-06
							HBG1	0.604821	8.9624	6.9476e-08	3.10143e-06
							AXDND1	4.40022	1.8623	6.95696e-08	3.10143e-06
							RPL41	0.538681	13.4973	7.31356e-08	3.25433e-06
							TBC1D4	-1.43249	4.28195	7.52178e-08	3.34076e-06
							ZNF311	-4.8477	1.75174	7.73318e-08	3.42828e-06
							NDUFA4	0.377663	10.9213	7.89516e-08	3.49361e-06
							BBOX1	-2.16334	2.87836	8.13167e-08	3.59161e-06
							MBNL3	-1.51564	3.87879	8.47626e-08	3.73691e-06
							COX6B1	0.413738	9.98252	8.65168e-08	3.80722e-06
							NPC2	-0.456549	10.3379	8.67138e-08	3.80887e-06
							PKN2	0.827776	6.15864	8.83861e-08	3.8752e-06
							TMX2	0.552438	7.30265	8.9701e-08	3.92565e-06
							SLC44A1	1.07241	6.01033	9.01899e-08	3.93983e-06
							RANBP3L	-2.92359	2.98728	9.18039e-08	3.99621e-06
							ID4	-3.11152	3.15204	9.18151e-08	3.99621e-06
							IL18	1.48858	3.19649	9.25214e-08	4.01963e-06
							PRR13	1.09953	5.21948	9.30969e-08	4.03729e-06
							PHLDB2	-0.845395	7.16941	9.45036e-08	4.09088e-06
							ZNRF3	-1.04336	4.10455	9.47304e-08	4.09328e-06
							ANKS4B	1.60764	3.44808	9.8145e-08	4.23317e-06
							MSH2	-0.931953	6.79785	1.00725e-07	4.33662e-06
							RPS12	0.53952	10.7347	1.02349e-07	4.39862e-06
							LTA4H	0.582006	8.80347	1.04762e-07	4.49421e-06
							ETV5	-1.46209	4.73771	1.06203e-07	4.5479e-06
							KHDRBS2	-3.62496	2.49804	1.1197e-07	4.78625e-06
							ERO1L	1.82886	3.85727	1.12174e-07	4.78644e-06
							SLC34A2	-5.35726	1.13043	1.21295e-07	5.16639e-06
							RAI14	-0.813537	6.48209	1.23961e-07	5.27053e-06
							ZNF32	-1.65751	3.12117	1.24362e-07	5.27822e-06
							PADI2	2.31255	2.66408	1.24933e-07	5.29305e-06
							EFHC1	-1.03908	5.46534	1.26265e-07	5.33998e-06
							PRICKLE1	-1.12506	4.66	1.2915e-07	5.44362e-06
							EPS8	1.30662	5.06782	1.29171e-07	5.44362e-06
							ZNF503	-1.4243	3.90668	1.32208e-07	5.56183e-06
							NR2F2	-0.71153	6.21364	1.33494e-07	5.60606e-06
							RYR2	5.29916	1.78339	1.34371e-07	5.63296e-06
							AP1M2	1.74172	3.53401	1.35486e-07	5.66977e-06
							NUP37	0.777586	6.68341	1.37946e-07	5.76264e-06
							SLC7A7	2.54271	3.15703	1.39627e-07	5.82267e-06
							LRRC69	3.76524	3.46048	1.44501e-07	6.01543e-06
							GPR110	-3.01344	2.20518	1.52921e-07	6.35486e-06
							CYP2B6	1.69249	2.40061	1.55492e-07	6.45049e-06
							COL5A2	-0.839891	6.0241	1.5781e-07	6.53529e-06
							VSIG1	-0.980195	5.043	1.73393e-07	7.16822e-06
							GOLGA3	1.22421	4.7145	1.75451e-07	7.24078e-06
							CETN2	-0.519857	7.89824	1.81206e-07	7.46538e-06
							PSMA5	0.549725	8.72149	1.86121e-07	7.6478e-06
							LAPTM4B	-0.505284	7.76758	1.86274e-07	7.6478e-06
							UGT2A3	1.46305	3.4789	2.04695e-07	8.37748e-06
							SYTL2	1.14683	4.6602	2.04748e-07	8.37748e-06
							ANKRD22	1.26501	3.47939	2.06949e-07	8.45306e-06
							SYT14	-2.69416	3.62693	2.07561e-07	8.46359e-06
							USP44	1.17807	7.84749	2.13636e-07	8.69647e-06
							TMEM176B	2.55212	2.61295	2.14372e-07	8.71161e-06
							ASNS	1.15219	6.29253	2.15343e-07	8.7318e-06
							HMGN5	-0.746513	8.25529	2.156e-07	8.7318e-06
							ZBTB10	-1.17871	4.53834	2.22019e-07	8.97657e-06
							DNAJC3	0.678135	6.1826	2.26944e-07	9.16019e-06
							LETMD1	1.48504	3.73362	2.28059e-07	9.17596e-06
							CKS1B	0.440283	9.67698	2.28103e-07	9.17596e-06
							MAP3K1	-1.50796	4.77023	2.32145e-07	9.32287e-06
							SPON1	-1.62265	5.12444	2.3393e-07	9.37879e-06
							ATP5G1	0.430616	8.20689	2.36411e-07	9.46238e-06
							ARL1	0.669964	5.55381	2.53504e-07	1.01215e-05
							EEA1	0.990573	5.77599	2.53725e-07	1.01215e-05
							SOX11	-0.577556	7.94196	2.6007e-07	1.03573e-05
							B3GALT5	4.44161	1.25351	2.65579e-07	1.05591e-05
							DSP	0.796409	7.64894	2.70198e-07	1.07249e-05
							CLCN3	0.713365	6.59316	2.71437e-07	1.07443e-05
							BCKDHB	1.34324	3.98914	2.71586e-07	1.07443e-05
							COL18A1	-1.38246	3.50418	2.72722e-07	1.07714e-05
							NAAA	5.07493	1.52888	2.76828e-07	1.09155e-05
							ADAMTS1	-2.12914	3.26548	2.78073e-07	1.09465e-05
							USMG5	0.27937	9.73173	2.80648e-07	1.10297e-05
							CRYM	-2.34878	2.63173	2.85696e-07	1.12097e-05
							KIAA0101	0.565378	8.27638	3.17257e-07	1.24276e-05
							COL1A1	-0.824953	7.5486	3.18801e-07	1.24677e-05
							LINC00678	4.13905	4.52916	3.27599e-07	1.27908e-05
							MKRN3	4.91774	0.914527	3.29895e-07	1.28594e-05
							CLC	1.46609	5.27635	3.3379e-07	1.29901e-05
							SAMD15	-1.866	4.44242	3.3838e-07	1.31473e-05
							EHHADH	1.9233	3.09629	3.41625e-07	1.32518e-05
							ACTN4	0.601294	5.12799	3.44679e-07	1.33486e-05
							ZFAND2A	1.6783	3.36585	3.50672e-07	1.35588e-05
							FIBIN	-2.53648	3.12158	3.54678e-07	1.36915e-05
							DAP3	0.684807	6.52096	3.58208e-07	1.38055e-05
							NDUFB9	0.428928	9.15888	3.60051e-07	1.38541e-05
							LOC283587	5.05941	0.931939	3.63558e-07	1.39666e-05
							RIOK3	0.995084	5.22291	3.75491e-07	1.44019e-05
							MINOS1	0.455427	7.87903	3.87976e-07	1.48569e-05
							CALCOCO2	0.633661	7.37405	3.9247e-07	1.50049e-05
							RPL18	1.19643	8.67177	4.00143e-07	1.52738e-05
							ZNF107	-1.3037	5.66608	4.10736e-07	1.56532e-05
							CPM	-0.875943	5.00848	4.13382e-07	1.57289e-05
							CDKN1B	1.79736	3.11088	4.20289e-07	1.59663e-05
							IFITM3	-0.743556	5.68124	4.23337e-07	1.60565e-05
							AOC1	3.1373	1.06514	4.24372e-07	1.60703e-05
							SERPINB9	1.24648	4.15909	4.67633e-07	1.76805e-05
							ZNF702P	-1.8464	2.87621	4.83536e-07	1.82529e-05
							UBA52	0.407537	10.2545	4.96666e-07	1.8719e-05
							COX6C	0.332951	9.53318	5.03647e-07	1.89257e-05
							ZNF204P	-1.18409	4.73303	5.03736e-07	1.89257e-05
							HDAC1	0.639967	7.16904	5.05035e-07	1.89447e-05
							DACH1	-2.03386	3.55846	5.13042e-07	1.9215e-05
							GPR126	0.86366	5.4238	5.31997e-07	1.98732e-05
							TMEM176A	2.44523	2.36837	5.32282e-07	1.98732e-05
							NDUFAB1	0.926889	4.38282	5.34192e-07	1.99135e-05
							GBP3	1.29108	4.31591	5.58838e-07	2.07933e-05
							SYNE2	-0.826153	7.48181	5.59534e-07	2.07933e-05
							MITF	-2.0071	4.30799	5.63272e-07	2.08997e-05
							CNIH4	0.480264	7.4563	5.72836e-07	2.12216e-05
							GBAS	-1.40679	4.94558	5.82464e-07	2.15449e-05
							TSPAN3	0.900185	5.48284	5.95219e-07	2.19826e-05
							CYYR1	-2.37924	2.9062	5.98414e-07	2.20665e-05
							TRO	-1.44602	4.31032	5.99824e-07	2.20844e-05
							CORO2A	1.06172	4.33453	6.0731e-07	2.23256e-05
							TUBB	-0.527301	8.96089	6.1971e-07	2.27465e-05
							SH3GL3	-3.64772	2.03141	6.39676e-07	2.34433e-05
							BPNT1	0.770613	4.88574	6.45446e-07	2.36186e-05
							STMN1	-0.483296	8.86592	6.80614e-07	2.48674e-05
							IRX2	-2.23461	3.92234	6.90799e-07	2.5201e-05
							MTMR11	1.37775	3.59687	6.92505e-07	2.52247e-05
							SP8	4.539	1.77838	7.03656e-07	2.55919e-05
							WT1	-4.00815	0.901709	7.1656e-07	2.60216e-05
							HOTAIRM1	-2.72461	1.97657	7.52824e-07	2.7297e-05
							STC1	-1.2022	4.10703	7.93033e-07	2.87114e-05
							KRT7	1.76209	2.1943	8.08794e-07	2.92377e-05
							DLGAP1	-3.79084	2.21872	8.42153e-07	3.03977e-05
							VEPH1	-2.25983	3.61321	8.48031e-07	3.05636e-05
							SLC25A5	0.554301	7.77195	8.50612e-07	3.06105e-05
							HOXA3	-1.44733	4.53372	8.64256e-07	3.10547e-05
							FKBP9	-1.00039	4.07597	8.87816e-07	3.18534e-05
							PEBP1	0.538547	6.97743	9.20449e-07	3.29747e-05
							ALDOA	0.60818	7.01187	9.31125e-07	3.33072e-05
							TARS	0.538862	8.33546	9.63733e-07	3.43966e-05
							CFH	-0.892683	4.69606	9.64457e-07	3.43966e-05
							IGSF10	-3.19587	2.55566	9.74191e-07	3.4692e-05
							NOP10	0.452417	9.05925	9.94466e-07	3.53178e-05
							FGB	1.138	3.78216	9.94722e-07	3.53178e-05
							COL1A2	-0.870541	8.30294	1.00736e-06	3.57136e-05
							HBG2	0.546652	8.9261	1.01775e-06	3.60283e-05
							AIG1	0.825602	6.14983	1.02332e-06	3.61719e-05
							KLHL13	-2.28704	3.55961	1.02904e-06	3.63206e-05
							TFAP2B	-3.93876	1.49168	1.04525e-06	3.68105e-05
							TPMT	0.644913	6.78641	1.04601e-06	3.68105e-05
							PPHLN1	0.510728	6.60772	1.051e-06	3.69319e-05
							PTPRS	-0.804068	5.81784	1.09196e-06	3.83147e-05
							MUC17	4.61745	0.821053	1.16208e-06	4.07154e-05
							ZG16	1.91763	2.61933	1.21679e-06	4.25697e-05
							ELMO1	1.98945	2.99627	1.22261e-06	4.27111e-05
							HTR2B	-2.06112	2.69885	1.24964e-06	4.35913e-05
							IARS2	0.900777	4.76705	1.29224e-06	4.50119e-05
							TMED2	0.509861	6.97585	1.29592e-06	4.50742e-05
							RUFY3	-0.657808	6.12117	1.32955e-06	4.61767e-05
							GJA1	-0.663515	7.12506	1.33292e-06	4.62266e-05
							QSER1	-0.73894	6.22624	1.39937e-06	4.84607e-05
							AQP7P3	-1.99853	2.60747	1.40403e-06	4.85518e-05
							GAL	3.85472	2.20324	1.46417e-06	5.05582e-05
							SLC7A11	1.04673	5.24516	1.4736e-06	5.08104e-05
							COL2A1	1.35666	2.88355	1.48033e-06	5.09691e-05
							MACC1	0.877732	6.28119	1.4909e-06	5.1224e-05
							STX2	-1.01674	4.48944	1.49279e-06	5.1224e-05
							RPL22L1	-0.554203	7.36236	1.49417e-06	5.1224e-05
							PTPRZ1	1.64204	6.14634	1.51924e-06	5.20089e-05
							MBIP	-0.643731	6.54769	1.57436e-06	5.38187e-05
							LHFPL3-AS2	-2.79668	2.23213	1.68215e-06	5.74215e-05
							HBE1	0.855505	11.9794	1.72557e-06	5.88196e-05
							NSA2	1.04299	8.28841	1.77553e-06	6.04362e-05
							CCDC80	-0.857727	5.82104	1.80584e-06	6.13805e-05
							C7orf41	-2.03175	3.24471	1.88184e-06	6.38731e-05
							MAP7D3	-0.801231	6.13857	1.90547e-06	6.4569e-05
							SCG5	-0.827311	6.14018	1.90775e-06	6.4569e-05
							TMBIM4	0.512685	8.04879	1.91596e-06	6.47552e-05
							CEP57L1	-0.885113	6.0587	1.93004e-06	6.5139e-05
							IARS	0.569865	7.20937	1.93668e-06	6.52709e-05
							TBPL2	3.65642	1.02393	1.98333e-06	6.67489e-05
							KIF5B	0.615568	6.81957	2.0202e-06	6.78942e-05
							EMC4	0.782155	5.82844	2.04782e-06	6.87258e-05
							DNER	-3.74677	1.69998	2.0628e-06	6.91313e-05
							HLTF	-0.723621	6.18403	2.21069e-06	7.39837e-05
							SP140L	1.28179	4.65795	2.23252e-06	7.46099e-05
							TC2N	2.28403	2.98149	2.26181e-06	7.5483e-05
							CLCA1	4.34214	1.70395	2.28215e-06	7.60082e-05
							HNRNPLL	-1.30224	3.8435	2.2839e-06	7.60082e-05
							SPATA17	-1.93428	3.43192	2.30062e-06	7.64582e-05
							MRPS35	0.735718	6.26476	2.33383e-06	7.74541e-05
							BLOC1S6	0.827711	5.50575	2.3923e-06	7.92843e-05
							GRPEL1	0.988184	5.387	2.41458e-06	7.99118e-05
							FGGY	-2.50063	2.8771	2.42571e-06	8.01692e-05
							EPAS1	1.8018	3.28836	2.49122e-06	8.22206e-05
							LOC100506013	1.69384	5.24919	2.50278e-06	8.24883e-05
							LDB2	-1.23549	5.74104	2.54501e-06	8.37643e-05
							DSEL	-1.09868	4.35756	2.55971e-06	8.40575e-05
							ABRACL	0.558929	7.41303	2.56095e-06	8.40575e-05
							TNFAIP6	-1.92806	3.92793	2.58446e-06	8.47128e-05
							TMEM69	1.29027	4.53376	2.62149e-06	8.58089e-05
							XRCC2	0.746476	6.25009	2.62783e-06	8.58987e-05
							NFYB	0.705151	6.31884	2.65691e-06	8.67308e-05
							CDHR5	3.97932	0.847755	2.67045e-06	8.70537e-05
							SRSF12	-1.59551	3.69297	2.70002e-06	8.78978e-05
							SLC6A13	-2.58886	1.90652	2.77111e-06	9.00892e-05
							RAMP1	2.2069	1.41754	2.8128e-06	9.13206e-05
							RAP1B	0.963466	5.20832	2.83102e-06	9.17873e-05
							MMP10	1.7268	3.68024	2.83549e-06	9.18075e-05
							SULF1	1.14292	5.34312	2.85837e-06	9.24232e-05
							PNMAL1	-1.30734	3.43307	2.87382e-06	9.27973e-05
							RABL5	-0.681692	5.72967	2.89632e-06	9.33975e-05
							CXXC4	1.56881	3.7063	2.922e-06	9.40985e-05
							BBS4	-0.655996	6.60933	3.06274e-06	9.84981e-05
							C12orf36	1.44874	4.3645	3.10737e-06	9.97993e-05
							RPL38	0.398069	9.23009	3.12682e-06	0.000100289
							DHRS11	2.21603	2.10225	3.15315e-06	0.000100998
							CAP1	0.438681	7.37	3.1747e-06	0.000101552
							FZD4	-1.32871	3.43444	3.22406e-06	0.000102993
							CYR61	-2.04356	2.13927	3.27978e-06	0.000104633
							PKP4	-0.79419	5.00732	3.29558e-06	0.000104997
							ADAMTS16	-4.29561	0.76793	3.31597e-06	0.000105506
							DIXDC1	-1.78644	3.78479	3.36632e-06	0.000106966
							SEC11C	0.963734	5.10276	3.43695e-06	0.000108955
							IL1RL1	4.92209	0.886739	3.43806e-06	0.000108955
							RPL7A	0.370928	10.6571	3.44309e-06	0.00010897
							SCAF11	0.547804	7.97557	3.55377e-06	0.000112325
							KLHL4	-0.957328	6.40816	3.57604e-06	0.000112879
							ADAMTS9-AS2	-4.78895	0.901537	3.70311e-06	0.000116736
							SEPT11	-0.570894	7.21725	3.79235e-06	0.000119392
							GDF9	3.17973	1.49384	3.84864e-06	0.000121004
							IL18R1	4.44943	0.966828	3.85572e-06	0.000121068
							RAD51AP1	0.699451	7.70974	3.90242e-06	0.000122373
							CDCA2	1.11776	4.75025	3.97521e-06	0.000124492
							TMEM106B	0.891588	5.37627	3.9807e-06	0.000124501
							RFC1	-0.446025	8.74449	4.0738e-06	0.000127246
							GCA	-0.861249	4.91298	4.13354e-06	0.000128944
							HOXA10	-1.06659	3.54024	4.14839e-06	0.000129238
							CLDN7	1.47502	3.08248	4.20117e-06	0.000130712
							SDHD	0.600738	7.26179	4.2349e-06	0.00013159
							ZNF883	-1.17592	5.4405	4.31494e-06	0.000133903
							FAM60A	0.559975	7.37806	4.38193e-06	0.000135806
							TBX15	-2.14355	1.68924	4.43331e-06	0.00013722
							TRIM23	-1.2948	3.77033	4.45689e-06	0.000137772
							RALBP1	0.680255	6.23546	4.47408e-06	0.000138053
							RSPO3	-2.24777	2.25569	4.47756e-06	0.000138053
							SP140	-4.9018	1.31607	4.48415e-06	0.000138078
							ATP2B1	0.541291	6.76984	4.5322e-06	0.000139378
							PRAP1	1.61424	2.45987	4.54156e-06	0.000139487
							MYOCD	4.60833	1.33637	4.62134e-06	0.000141755
							ACRV1	3.05999	2.01754	4.7773e-06	0.000146351
							CYCS	0.409526	10.0629	4.84319e-06	0.000148179
							TMPRSS15	-3.93398	1.08831	4.86104e-06	0.000148535
							CYP2C9	3.17579	1.14302	4.889e-06	0.000149199
							IPCEF1	-3.1614	1.57821	5.1649e-06	0.000157405
							CAPN8	1.18385	3.31533	5.17107e-06	0.000157405
							HLF	-3.34678	1.71518	5.19371e-06	0.000157893
							CENPV	1.56435	3.81576	5.29801e-06	0.000160859
							MXD1	1.43649	3.38873	5.44702e-06	0.000165173
							IFT81	-0.647545	7.0332	5.50381e-06	0.000166684
							CFL1	0.509163	6.76878	5.51423e-06	0.000166788
							CEP70	-0.80182	6.77401	5.54451e-06	0.000167492
							NOX1	3.15882	1.30363	5.66676e-06	0.000170969
							GDA	3.0381	2.04495	5.77665e-06	0.000174064
							NREP	-0.489069	8.02726	5.81271e-06	0.00017493
							TFDP2	-0.430159	8.28552	5.83296e-06	0.000175316
							ZFP14	-0.992464	4.74341	5.84024e-06	0.000175316
							MMAB	0.92948	4.70466	5.84753e-06	0.000175316
							LINC00488	-3.49304	1.8891	5.93767e-06	0.000177795
							GUSB	1.46128	3.51298	6.02538e-06	0.000180196
							SFMBT1	1.89588	3.17897	6.06445e-06	0.000181137
							MYH10	-0.562923	9.48178	6.26479e-06	0.000186888
							MYEF2	-0.957491	4.69319	6.30172e-06	0.000187755
							JARID2	-0.791445	6.32669	6.39823e-06	0.000190393
							HNMT	1.02288	4.82941	6.40857e-06	0.000190464
							CYS1	-3.15043	1.64324	6.42668e-06	0.000190574
							SRSF3	0.351969	10.7504	6.42825e-06	0.000190574
							PHACTR2	0.457399	6.49358	6.47482e-06	0.000191717
							FLNB	1.08452	4.33371	6.48434e-06	0.000191762
							TFAP2A	-3.15823	1.01833	6.51937e-06	0.000192559
							ESD	-0.535134	8.23058	6.5564e-06	0.000193414
							RARS2	0.637543	6.69578	6.70069e-06	0.000197427
							TMEM97	0.582279	6.96195	6.82557e-06	0.000200858
							PI3	3.28629	1.10148	6.84428e-06	0.000201161
							ADAM17	-0.731526	5.6334	6.98257e-06	0.000204974
							LINC00669	-4.27007	1.85051	7.00187e-06	0.000205288
							S100A14	1.49689	2.59211	7.37482e-06	0.000215957
							TNFSF15	1.19936	3.73793	7.51215e-06	0.00021971
							DOCK5	1.49344	3.494	7.5698e-06	0.000221125
							VWDE	-2.47016	3.16201	7.60638e-06	0.000221922
							WDR91	-1.84767	2.28589	7.64763e-06	0.000222854
							HSD3B1	4.96618	0.872664	7.73832e-06	0.000225171
							POSTN	-1.05519	8.44926	7.74598e-06	0.000225171
							BUB1	0.653493	7.44449	8.17128e-06	0.000237245
							ZNF611	-1.60167	3.00157	8.30039e-06	0.000240701
							EWSR1	0.501989	6.58577	8.64874e-06	0.000250499
							CEP85L	0.801403	6.0417	8.6852e-06	0.00025125
							ATP5C1	0.386922	9.84518	8.82055e-06	0.000254636
							PNISR	-0.320549	10.039	8.82353e-06	0.000254636
							SBK1	-1.78557	3.04264	9.00368e-06	0.000259521
							UQCRC2	0.516555	7.89024	9.0296e-06	0.000259955
							BZW1	0.381403	9.84224	9.15658e-06	0.000263293
							SLMO2	0.622089	6.56227	9.18781e-06	0.000263873
							ZEB1	-0.696368	6.86084	9.29451e-06	0.000266617
							APOL6	1.20249	3.03114	9.34732e-06	0.000267811
							DZIP3	-0.773059	6.94868	9.48824e-06	0.000271523
							PRELID2	0.781283	4.47801	9.53389e-06	0.000272503
							WWTR1	-0.769127	5.68918	9.69271e-06	0.000276711
							SLFN13	-0.983752	4.06921	9.78238e-06	0.000278938
							LYAR	0.837045	6.15826	9.82575e-06	0.000279841
							RPL22	0.536433	11.4232	1.01283e-05	0.000288114
							ATP5H	0.421231	8.44865	1.02463e-05	0.000291125
							OPCML	-4.04985	1.59567	1.02885e-05	0.000291977
							LDOC1	-1.81339	2.782	1.03403e-05	0.000293098
							TRIAP1	0.563044	7.44199	1.08182e-05	0.000306281
							AURKA	0.574304	6.92637	1.08625e-05	0.00030717
							BLMH	-1.28997	4.29532	1.0893e-05	0.000307669
							EEF1B2	0.387995	9.80312	1.09115e-05	0.000307828
							LPHN2	-0.99443	4.842	1.10043e-05	0.000310081
							WARS	0.818984	5.46978	1.10291e-05	0.000310413
							RNASE6	2.18389	2.60162	1.12232e-05	0.000315269
							ELP4	-1.59321	4.95754	1.1228e-05	0.000315269
							ERH	0.342444	10.1646	1.12798e-05	0.000316349
							SYBU	4.76783	0.862386	1.13048e-05	0.00031668
							SLC14A2	-1.2283	3.00445	1.13922e-05	0.000318755
							GCNT1	1.49655	4.02622	1.14392e-05	0.000319695
							PLBD1	2.01629	2.75521	1.14536e-05	0.000319724
							PCDP1	-2.94284	2.34069	1.16444e-05	0.000324671
							LRRC66	2.76056	1.13409	1.2157e-05	0.000338232
							GPR35	3.41837	1.22851	1.21591e-05	0.000338232
							MISP	2.4062	1.01032	1.22784e-05	0.000341155
							ELOVL6	0.821097	5.9021	1.2414e-05	0.000344522
							CLDN3	-1.55031	2.26972	1.24543e-05	0.00034524
							DDC	2.82157	2.79225	1.27077e-05	0.000351853
							CLCN5	-1.08165	4.4639	1.30179e-05	0.000360027
							DPYD	-2.36589	2.75632	1.32883e-05	0.000367079
							PATE2	3.5541	1.09905	1.33589e-05	0.000368332
							ATP5B	0.51328	6.87455	1.33645e-05	0.000368332
							PRDM1	1.78389	2.24134	1.37482e-05	0.000378473
							PITX1	2.85592	1.04073	1.38309e-05	0.00038031
							ABCC3	2.33291	2.81603	1.40363e-05	0.000385515
							HOOK1	-0.968219	4.95758	1.4411e-05	0.000395143
							HNF1B	-2.09604	2.39227	1.44199e-05	0.000395143
							CLIC1	0.564582	5.84012	1.44641e-05	0.000395898
							LSM3	0.350369	10.1771	1.45484e-05	0.000397751
							CNNM4	2.15634	1.92497	1.45665e-05	0.00039779
							GIPC2	2.13734	2.13755	1.49006e-05	0.000405998
							APOBEC3C	1.06112	4.70667	1.4901e-05	0.000405998
							OAF	1.17398	2.93269	1.49219e-05	0.000406103
							TUBA1C	0.691958	5.43824	1.52549e-05	0.000414693
							SERPINB5	4.6893	1.1874	1.5391e-05	0.000417919
							LPCAT3	1.38319	3.09679	1.5552e-05	0.000421811
							SLC25A12	-1.34548	3.90341	1.56432e-05	0.000423802
							RPS19	0.476445	11.2023	1.56742e-05	0.000424162
							FPGT	1.89077	3.91873	1.57797e-05	0.000426535
							KCTD8	-3.7226	1.72074	1.58469e-05	0.000427431
							NAPG	0.609337	6.3347	1.58487e-05	0.000427431
							HOXD3	-2.86502	1.12991	1.59362e-05	0.000429022
							SERPINA4	2.09373	1.77397	1.59436e-05	0.000429022
							PLCB4	1.0375	4.28932	1.59793e-05	0.000429396
							ECHDC1	0.482889	7.15757	1.59934e-05	0.000429396
							CA3	2.90516	2.44576	1.62716e-05	0.000436374
							SOX5	1.6989	3.48985	1.65335e-05	0.000442901
							EPB41L4B	1.67694	3.20511	1.66021e-05	0.000444242
							RASSF8	-0.907056	5.29768	1.67522e-05	0.000447755
							KRT23	-2.81242	2.55479	1.69771e-05	0.00045326
							GYPA	1.05193	5.36262	1.75873e-05	0.000468553
							IFT57	-0.967281	5.54367	1.75891e-05	0.000468553
							PYROXD1	1.79187	2.81825	1.77895e-05	0.000473362
							ADHFE1	-2.96429	1.26457	1.78116e-05	0.000473424
							DDX47	0.661609	6.31639	1.82637e-05	0.000484901
							LINC00648	3.06191	1.87929	1.84273e-05	0.000488701
							PBLD	1.18384	4.28763	1.85078e-05	0.000490292
							ARL3	-0.549488	7.81838	1.87832e-05	0.000497037
							AMICA1	2.76294	2.32613	1.89532e-05	0.000500982
							ATP10B	3.08104	1.59105	1.90476e-05	0.000502919
							CCDC50	-0.818481	4.43045	1.92203e-05	0.00050692
							C4BPA	4.23798	0.932326	1.9279e-05	0.000507908
							KIF3A	-0.787838	6.62244	1.96576e-05	0.000517311
							BOC	-3.54094	0.933653	1.97246e-05	0.000518503
							SNX29	-2.23611	2.42838	1.98507e-05	0.000521245
							SMIM7	0.472443	7.63878	1.98858e-05	0.000521594
							OGDHL	-3.59084	1.38603	2.06289e-05	0.00054049
							PRKRA	-1.01845	4.39391	2.06604e-05	0.000540723
							ROBO1	-0.932579	5.44188	2.09728e-05	0.000548298
							ADAM12	-1.89599	2.12103	2.13353e-05	0.000557165
							ST6GALNAC1	1.11248	3.18755	2.14911e-05	0.000560623
							ZC3HAV1	-0.764185	5.6386	2.1556e-05	0.000561702
							RIMS2	-2.87964	2.72059	2.19325e-05	0.000570889
							DKK3	-2.06807	3.04964	2.19827e-05	0.000571573
							TMCC1	0.917731	4.83217	2.20148e-05	0.000571786
							STARD10	1.38363	2.42537	2.21868e-05	0.00057504
							GSTM3	-0.51414	7.41037	2.21882e-05	0.00057504
							B3GNT3	2.24571	1.77596	2.23452e-05	0.000578482
							ESRG	1.02566	7.7059	2.25596e-05	0.0005834
							IRX3	-2.58886	1.35356	2.32183e-05	0.000599785
							EFNA1	1.33526	2.32357	2.34023e-05	0.000603427
							EXPH5	-0.740011	4.65204	2.34098e-05	0.000603427
							TMEM141	1.56898	2.76628	2.34618e-05	0.000604117
							ALG8	0.492199	6.68517	2.36322e-05	0.000607848
							RAB13	-0.708197	5.29023	2.40527e-05	0.000618
							STS	2.81994	2.16441	2.42725e-05	0.000622976
							DDX3Y	-0.394452	7.40709	2.43475e-05	0.000624231
							C10orf11	-3.20485	1.81538	2.44175e-05	0.000625355
							PDCD10	0.3907	8.08727	2.49473e-05	0.00063824
							ERP29	0.682645	4.85503	2.50948e-05	0.000641326
							ANPEP	2.90825	1.21414	2.54426e-05	0.00064952
							CREB5	-1.98108	3.7979	2.61163e-05	0.000666007
							MYL12A	0.306387	8.80485	2.61985e-05	0.000667392
							LOC375295	-1.48096	3.93603	2.62942e-05	0.000669115
							CCT2	0.276308	10.8213	2.63584e-05	0.000670035
							ZFP2	-2.9285	2.08089	2.65174e-05	0.000673362
							RBP1	-0.854065	4.82722	2.65657e-05	0.000673873
							GYPB	0.749401	5.04386	2.66666e-05	0.000675715
							SLC51B	3.9997	0.865912	2.69514e-05	0.000682208
							MIAT	-1.37567	4.26258	2.75006e-05	0.000695011
							GRB14	-1.43293	4.3431	2.75154e-05	0.000695011
							GATA3	-2.4311	2.24005	2.75853e-05	0.000696041
							PSAT1	0.871884	5.58825	2.76586e-05	0.000697155
							ARMC4	1.72974	3.92871	2.81828e-05	0.000709618
							PLAC1	-3.00644	1.9502	2.85491e-05	0.000718085
							DZIP1	-0.748748	4.51029	2.91574e-05	0.000732115
							LOC643401	1.37828	3.6713	2.91682e-05	0.000732115
							LACTB2	1.47802	4.13565	2.98018e-05	0.000747233
							ASPN	-1.40441	6.05473	2.98894e-05	0.000748413
							ZNF146	-0.5356	7.97164	2.99115e-05	0.000748413
							DYNC2LI1	-0.819137	5.48596	3.00421e-05	0.000750895
							GABRA2	2.19646	2.00334	3.01833e-05	0.000753636
							PPP2R2B	-2.82502	3.90924	3.07699e-05	0.000767482
							SOWAHC	1.24558	4.40283	3.08528e-05	0.000767982
							ZNF10	4.19314	1.62632	3.08543e-05	0.000767982
							HLA-DOA	-1.75347	2.8802	3.11942e-05	0.000775635
							CYB5B	0.467887	9.29103	3.2229e-05	0.000800531
							SEPHS1	1.03364	5.16908	3.23457e-05	0.000802597
							SPCS1	0.612781	6.41713	3.25763e-05	0.00080748
							UQCRQ	0.315777	8.12249	3.28355e-05	0.000813061
							ZFPM2	-2.9873	1.34874	3.33624e-05	0.000825252
							SRY	-1.52061	2.47359	3.36277e-05	0.000830956
							LUC7L3	-0.369875	9.07212	3.37972e-05	0.000833015
							FREM1	-2.0623	3.03357	3.38005e-05	0.000833015
							SRGAP1	0.80271	5.07195	3.38157e-05	0.000833015
							OAZ1	0.448162	6.87371	3.40447e-05	0.000837793
							COX14	0.561187	6.71939	3.45124e-05	0.00084797
							S100A8	1.65369	2.58192	3.45292e-05	0.00084797
							DHX40	-1.06826	4.48513	3.49542e-05	0.000857526
							HTATSF1	-0.773333	6.91995	3.61378e-05	0.000885653
							S100A11	0.464185	7.27467	3.62551e-05	0.000887618
							BTBD16	-2.18701	2.61901	3.66606e-05	0.000896627
							TGFB2	-2.0103	3.38457	3.69045e-05	0.00090167
							AK4	0.66101	6.40812	3.70208e-05	0.00090293
							SLC5A12	1.77363	3.64626	3.70371e-05	0.00090293
							C19orf33	1.67737	1.80759	3.70695e-05	0.00090293
							VEZT	0.57388	6.67964	3.71089e-05	0.00090297
							E2F5	2.20502	2.10965	3.73777e-05	0.000908587
							GPR55	4.21073	0.682505	3.77356e-05	0.000916353
							HGF	-1.52624	3.04641	3.81089e-05	0.00092448
							PCOLCE2	-3.74448	1.78291	3.83037e-05	0.000928263
							MIB1	-0.830288	5.83448	3.84165e-05	0.000930053
							INVS	2.31208	1.97709	3.88446e-05	0.000939466
							VCAN	-0.443968	8.20462	3.9001e-05	0.000942294
							PSMD2	-0.695423	5.02708	3.94469e-05	0.000952106
							SSBP1	0.38271	9.75694	3.98031e-05	0.000959732
							ZNF329	1.48247	3.19539	3.98774e-05	0.000960554
							ATP6V0A4	-3.73455	1.54609	4.00135e-05	0.000962862
							CDKN2B-AS1	2.25786	1.28666	4.01897e-05	0.000966129
							FRMD4B	-1.47188	5.11496	4.06162e-05	0.000975401
							TAF9	0.318037	9.25515	4.09842e-05	0.00098325
							REG1A	2.23932	3.19503	4.15026e-05	0.000994689
							CLDN1	1.22808	3.57451	4.17802e-05	0.00100034
							CREB3L4	-1.97374	2.34059	4.18732e-05	0.00100156
							USP7	0.663856	5.10227	4.19778e-05	0.00100306
							SEMA3A	0.483055	6.5787	4.20313e-05	0.00100334
							CEP170	-0.689975	6.04528	4.2113e-05	0.00100428
							FCGR2A	3.39538	0.849449	4.26085e-05	0.00101508
							COBLL1	-1.25132	4.44791	4.27024e-05	0.00101574
							KIAA1551	0.577401	7.07983	4.2763e-05	0.00101574
							VAT1	-0.991432	3.29647	4.27636e-05	0.00101574
							DTX4	1.44002	3.4161	4.33867e-05	0.00102952
							TFAP2C	2.10502	2.71501	4.36767e-05	0.00103537
							MOAP1	-1.21962	3.86004	4.46766e-05	0.00105802
							METTL7A	0.955702	5.10605	4.48375e-05	0.00106078
							SDC3	-1.43175	2.34006	4.48822e-05	0.00106079
							NUTF2	-0.434406	6.88095	4.57526e-05	0.0010803
							PFN2	-0.58409	5.79877	4.61114e-05	0.00108769
							PRSS3P2	4.27836	0.705437	4.65617e-05	0.00109723
							SLC16A9	-2.91347	2.63226	4.81511e-05	0.00113357
							ASAP2	-0.489704	6.01348	4.84345e-05	0.00113912
							TAF7	-0.483191	7.29241	4.8972e-05	0.00115063
							NBEA	-1.10246	4.99879	4.90446e-05	0.0011512
							BEX2	-0.971244	4.17658	4.91215e-05	0.00115179
							NR1I2	4.18738	0.774962	4.9166e-05	0.00115179
							CAPZA1	0.331712	8.2242	4.92765e-05	0.00115324
							NNAT	1.11462	4.13643	4.95571e-05	0.00115868
							GALNT14	-2.88464	1.64604	5.00432e-05	0.00116763
							EDF1	0.399499	7.01295	5.00558e-05	0.00116763
							TCTEX1D2	-1.13988	4.56543	5.00865e-05	0.00116763
							HOXD-AS1	-2.38576	1.91108	5.094e-05	0.00118637
							LSR	1.2508	3.39788	5.11199e-05	0.0011894
							UBE2L3	0.386023	9.30297	5.17895e-05	0.00120295
							ENDOV	-3.49378	1.53478	5.1803e-05	0.00120295
							CDX1	3.9773	0.637948	5.19017e-05	0.00120407
							NUBP2	-1.66593	2.4018	5.23182e-05	0.00121255
							ZNF33A	-0.557804	6.68073	5.29728e-05	0.00122653
							COL12A1	-1.11678	4.9954	5.55261e-05	0.00128441
							FAM115A	-0.536676	6.66037	5.66659e-05	0.00130951
							ZDHHC20	0.927079	4.25484	5.71279e-05	0.00131703
							NUDT4	0.854259	3.90733	5.71365e-05	0.00131703
							ATP8A1	1.94567	2.89833	5.71567e-05	0.00131703
							GPRIN3	-3.19196	1.43795	5.90086e-05	0.00135839
							PLD3	-0.932697	4.99519	5.9188e-05	0.00136121
							CLDN19	-1.8213	2.3449	5.94809e-05	0.00136589
							PLTP	-1.34605	3.69867	5.95058e-05	0.00136589
							APOC3	3.51907	0.696878	5.97429e-05	0.00137002
							FOLR1	1.73421	2.44662	5.98242e-05	0.00137057
							VTCN1	-1.71166	2.92584	6.00823e-05	0.00137516
							COPZ1	0.378223	8.06008	6.01792e-05	0.00137606
							TPI1	0.336773	7.25731	6.06081e-05	0.00138435
							CIDEC	3.03521	0.825775	6.06578e-05	0.00138435
							ZNF844	-2.67953	1.65381	6.34033e-05	0.00144563
							MANSC1	1.1107	4.47723	6.35183e-05	0.00144687
							ANP32B	0.696365	5.9534	6.35981e-05	0.00144731
							NAT2	3.68536	2.28229	6.37338e-05	0.00144902
							PAFAH2	1.29563	3.32981	6.4232e-05	0.00145833
							RPS24	0.380586	10.9571	6.42654e-05	0.00145833
							FAM229B	-0.66263	6.12115	6.44893e-05	0.00146202
							ENTPD5	1.56261	2.86035	6.48811e-05	0.00146951
							SLC7A9	3.59966	1.32068	6.55698e-05	0.0014837
							AKR1B1	-0.739861	6.32817	6.73338e-05	0.00152218
							GOLT1A	1.43795	3.22035	6.82703e-05	0.00154189
							NADKD1	-0.692932	4.75944	6.873e-05	0.00155081
							SEMA4D	-1.23354	3.01218	6.89436e-05	0.00155416
							SLN	4.31195	1.2915	6.99671e-05	0.00157574
							ZNF770	-0.639618	6.7648	7.10476e-05	0.00159857
							PART1	-1.64773	2.32895	7.12415e-05	0.00160143
							EGLN3	0.941651	4.50653	7.17791e-05	0.00161199
							MOGAT3	4.36562	0.712231	7.1874e-05	0.00161261
							TAGLN2	-0.848534	3.59071	7.20016e-05	0.00161396
							THUMPD1	-0.623497	6.88887	7.21734e-05	0.00161629
							AGMAT	0.858699	3.59105	7.32983e-05	0.00163995
							LRP12	-1.53529	3.60962	7.35165e-05	0.00164329
							CCDC148	-2.17269	3.81746	7.40072e-05	0.00165271
							ERGIC2	0.377968	8.20112	7.4282e-05	0.0016573
							ACTA2	0.730345	6.72851	7.50064e-05	0.0016719
							RHOQ	-0.889296	4.48391	7.59818e-05	0.00169081
							PSMA6	0.242557	9.63448	7.59961e-05	0.00169081
							PLAU	-2.40943	1.40873	7.62835e-05	0.00169562
							ATP5J2	0.357751	7.70866	7.66955e-05	0.0017032
							TNNI3	-2.82537	1.8955	7.75886e-05	0.00172143
							WT1-AS	-4.01373	0.676995	7.83996e-05	0.00173627
							SOSTDC1	-1.75746	4.13609	7.85113e-05	0.00173627
							ZEB1-AS1	-3.43403	1.87459	7.85238e-05	0.00173627
							ZNF618	-1.05092	3.97096	7.85484e-05	0.00173627
							RPL29	0.330216	8.42275	7.92122e-05	0.00174933
							NUP107	0.543183	7.23822	7.93001e-05	0.00174966
							DCAF17	-1.7007	3.40916	8.08421e-05	0.00178039
							EBP	0.523593	6.65761	8.08422e-05	0.00178039
							RNF41	0.502261	5.78655	8.16265e-05	0.00179601
							MMP25	-3.32405	1.53457	8.24199e-05	0.0018118
							ROMO1	0.46588	6.33497	8.30213e-05	0.00182334
							MBNL1	0.718869	6.09684	8.35293e-05	0.00183281
							HOXB-AS3	1.90109	2.30163	8.41607e-05	0.00184497
							PGK1	0.364696	9.76146	8.45671e-05	0.00185207
							NIF3L1	0.517571	6.67862	8.46397e-05	0.00185207
							TFE3	-1.83996	2.45707	8.65118e-05	0.00189131
							INPP1	1.47113	3.7313	8.66132e-05	0.00189179
							CASR	-3.3522	0.709687	8.97271e-05	0.00195802
							GSDMB	1.9739	1.81567	9.08265e-05	0.0019802
							TPM3	0.383024	8.03327	9.17134e-05	0.00199771
							TMEM161B-AS1	-1.62037	3.66766	9.43776e-05	0.00205387
							HIP1	-0.689703	5.11447	9.44913e-05	0.00205448
							NCALD	-1.3063	3.87088	9.47704e-05	0.00205867
							SUCLG2	0.632111	5.49443	9.49014e-05	0.00205964
							ATRX	-0.373907	9.07931	9.64622e-05	0.00209162
							ANKRD34B	-4.42289	0.873466	9.6601e-05	0.00209246
							ZPLD1	-4.28325	0.757977	9.66763e-05	0.00209246
							ALG13	0.841904	4.90664	9.71692e-05	0.00210123
							ITGB1	-0.397146	7.45095	9.74326e-05	0.00210502
							EXOSC8	0.342083	8.04448	9.82747e-05	0.00212129
							ODC1	-1.1256	4.71927	9.85791e-05	0.00212594
							TMEM87A	0.511128	7.34577	9.97014e-05	0.00214821
							MYO5C	1.03177	4.55625	0.000100011	0.00215293
							GCNT2	0.821598	4.51371	0.000100865	0.00216853
							MAP1B	-0.392164	8.83199	0.000100917	0.00216853
							SLITRK6	1.53757	3.40152	0.000101016	0.00216872
							PSME3	0.93973	4.19391	0.000101229	0.00217133
							EPHA3	-1.26971	3.35846	0.000102319	0.00219276
							ATHL1	-2.34643	1.4742	0.000102943	0.00220415
							FCER1G	1.58715	3.00868	0.000103224	0.00220817
							RBM3	0.526872	6.85558	0.000103705	0.00221648
							CLUL1	-2.28164	1.53659	0.000103942	0.00221958
							ECEL1	-4.28492	0.772357	0.000106567	0.0022736
							COL9A1	2.37744	2.57576	0.000106698	0.00227435
							IGFBP5	-0.771105	9.52249	0.000106991	0.00227856
							ARL13B	-0.856981	5.18546	0.000108864	0.00231546
							AK9	-1.31346	3.98443	0.000108917	0.00231546
							NIN	-0.782764	5.42424	0.000109361	0.00232283
							BCAT1	0.476007	8.12549	0.000109477	0.00232322
							CYP2S1	1.47762	2.8048	0.000110772	0.00234861
							SRP54	-0.296698	8.28968	0.000112177	0.00237631
							UGT2B7	-0.860729	6.37536	0.000113877	0.00240848
							MTCH1	-1.0755	3.89755	0.000113897	0.00240848
							DSE	-1.01858	4.36884	0.000114451	0.00241804
							ZNF385B	-3.9566	1.14378	0.000115223	0.00243207
							AGPAT4	-1.3719	3.68385	0.000115318	0.00243207
							GRIP1	-2.21871	2.87598	0.000117097	0.0024674
							TPCN2	-3.78496	1.15659	0.000117436	0.00247236
							SPEF2	-1.69182	3.9415	0.000118722	0.00249723
							FAP	-1.10233	4.53198	0.0001201	0.00252401
							LOC339862	5.63265	1.43038	0.000121154	0.00254391
							ZSCAN9	-1.36612	3.61785	0.000121705	0.00255325
							C1orf173	-4.13822	0.704438	0.000122469	0.00256701
							FERMT2	-0.743886	4.41729	0.000122993	0.00257573
							CNKSR2	3.60652	2.32119	0.000123743	0.00258786
							WNK3	-0.877009	5.79218	0.000123788	0.00258786
							ZNF12	-1.27332	2.85437	0.000125407	0.0026194
							PTPRG	-1.16095	3.77636	0.000125537	0.00261984
							FBXO17	-1.47058	2.31578	0.000125757	0.00262212
							NDUFC2	0.374035	6.61189	0.00012612	0.00262741
							SERINC5	0.667109	5.28397	0.000126856	0.00263991
							GDE1	0.673774	5.31281	0.000126995	0.00263991
							LAMB3	1.52998	3.67405	0.000127051	0.00263991
							CAPN12	1.57577	2.09557	0.000127714	0.00265137
							TRHDE-AS1	-2.35558	1.72937	0.000128925	0.00267419
							COX19	0.726028	4.76337	0.000129136	0.00267624
							CRISPLD1	-0.887222	4.93016	0.000129915	0.00269005
							BMP4	1.27341	3.0294	0.00013049	0.00269962
							ZNF675	-0.946601	5.55791	0.000131189	0.00271061
							PTGDR	4.22758	0.701862	0.000131248	0.00271061
							BDH2	-0.479777	7.32664	0.000132666	0.00273752
							FAM84A	2.08439	2.55035	0.000132957	0.00274115
							LRRC37A11P	0.986276	4.05353	0.000135952	0.00280049
							ZNF682	-0.958031	4.7123	0.00013806	0.00284147
							NR6A1	0.611566	7.02864	0.000138811	0.00285447
							RFTN2	-1.09868	3.69994	0.000139185	0.00285969
							NDUFA1	0.338163	6.9176	0.00013931	0.00285981
							DRAM2	0.505721	6.45532	0.000140556	0.0028829
							ZNF280B	-0.936122	4.9989	0.000141011	0.00288975
							SPHKAP	3.15868	0.99848	0.000141566	0.00289864
							TLR5	-2.33927	1.91191	0.000141934	0.00290369
							WNK4	3.00344	0.723987	0.000142278	0.00290688
							ZNF138	-0.864712	6.16697	0.000142333	0.00290688
							AKNAD1	-5.15511	1.02712	0.000143913	0.00293663
							PPBP	1.27638	2.68798	0.000144882	0.00295389
							UMPS	0.465707	6.67497	0.000147022	0.00299232
							SMAD1	-0.766017	5.74568	0.000147128	0.00299232
							SLC39A4	3.68664	0.640923	0.000147198	0.00299232
							RPL6	0.489886	12.9993	0.000147268	0.00299232
							ADRA2C	-3.21764	1.30252	0.000147394	0.00299233
							RBMS2	0.691271	5.04235	0.000149484	0.0030322
							A1BG	-2.75132	1.03772	0.000150328	0.00304644
							TBC1D9	-1.77999	2.96956	0.000150442	0.00304644
							NOP56	0.489887	7.36989	0.000151657	0.00306846
							GATM	1.32692	4.4663	0.000153002	0.00309304
							ZNF260	-0.58955	5.71726	0.00015622	0.00315543
							CCDC113	-1.23669	4.43211	0.000158079	0.00319028
							FGF7	-1.55938	3.2974	0.000159722	0.00322073
							NCOA4	0.418504	7.26804	0.000161155	0.00324687
							PROM1	-0.629204	5.84627	0.000161764	0.0032557
							CHPT1	1.53997	3.0612	0.000161865	0.0032557
							MIR100HG	-0.92911	5.48869	0.000165913	0.0033343
							SRP68	-0.838605	4.81466	0.000168168	0.00337678
							PEA15	-1.29651	2.53608	0.000169765	0.00340598
							S100P	0.896219	4.4438	0.00017059	0.00341968
							LAMTOR5	-0.356579	8.44402	0.000171166	0.00342834
							GPR87	1.62056	2.72218	0.000171941	0.00344098
							DNAH7	-2.05133	2.37428	0.000172762	0.00345452
							SULF2	1.23972	3.82873	0.000173812	0.00347261
							PAWR	1.04904	3.42501	0.000174372	0.00348089
							LRP2	-1.61517	3.57857	0.000174811	0.00348674
							FER1L6	1.355	4.22715	0.000175557	0.0034987
							GAP43	-1.33951	4.57989	0.000175896	0.00350253
							ANXA4	0.712442	6.13364	0.000177591	0.00353333
							LEPREL1	-1.74946	2.86933	0.000180075	0.00357978
							DNAJC15	0.580443	6.77122	0.000183212	0.00363911
							PIANP	-3.14765	1.13246	0.000184226	0.00365621
							SORCS3	-3.64509	0.840227	0.000185661	0.00368164
							PBDC1	0.417974	7.56114	0.000185993	0.00368515
							KCNJ1	-4.34248	0.816394	0.000186767	0.00369743
							DDIT3	1.02877	3.10087	0.000188846	0.0037355
							ALDH7A1	-0.506748	6.82314	0.00018933	0.00374198
							PLXNA4	-2.42024	1.73696	0.000190499	0.00376197
							OBSL1	-1.38123	2.79004	0.000191473	0.00377808
							DYNC2H1	-0.752876	5.78549	0.000194501	0.0038318
							HBD	1.41155	3.16695	0.000194517	0.0038318
							MUC4	3.92408	0.712217	0.000194803	0.00383429
							HOXC11	3.41653	0.670083	0.000194991	0.00383483
							VPS13C	-0.716751	6.78148	0.000195934	0.00385019
							RAB7L1	-0.74087	4.88239	0.000197295	0.00387376
							RPS18	0.355357	9.79096	0.000201585	0.00395473
							FNDC5	-1.49121	2.35491	0.000202171	0.00396297
							ETFB	0.650167	4.9609	0.000203981	0.00399519
							PCDH7	-1.24744	3.80614	0.000206055	0.00403251
							CNIH	0.352822	8.27209	0.000208047	0.0040673
							ASPH	-0.798263	5.3133	0.000208173	0.0040673
							DCLK1	-1.45167	4.08161	0.000208753	0.00407528
							FDPS	0.407552	8.08084	0.000210463	0.00410213
							TRAM1L1	-3.58587	1.16123	0.000210471	0.00410213
							KIAA1009	-0.600632	6.66358	0.000211006	0.00410919
							BCL10	0.648258	5.14983	0.000212438	0.00413119
							DKC1	0.440284	8.10144	0.000212481	0.00413119
							SLC27A2	2.29061	2.68683	0.000213109	0.00414003
							C6orf211	0.470288	8.31026	0.000213381	0.00414195
							GPI	-0.349128	6.675	0.000214214	0.00415475
							COG2	0.78441	4.52552	0.000215893	0.00418391
							MYH14	2.17707	2.39345	0.000216494	0.00419216
							LOC93432	4.6821	0.895851	0.000220334	0.00426307
							MXRA5	-1.35582	3.36592	0.000221859	0.00428909
							RFX4	2.00316	2.68803	0.000223265	0.00431059
							CERCAM	-2.07279	1.16538	0.000223402	0.00431059
							ASL	1.47186	2.57555	0.000223512	0.00431059
							HSF2	-0.692219	5.81075	0.000224352	0.0043233
							PLA2G16	0.908981	4.87151	0.000226915	0.00436917
							SLC16A2	-1.35421	3.09139	0.000229466	0.00441473
							CD81	-0.689802	4.4644	0.000230632	0.00443359
							TNFAIP8	0.840963	5.12468	0.000231223	0.00444139
							LPAR4	-1.23854	4.78904	0.000232859	0.00446922
							HMGA1	0.827827	5.18571	0.000233231	0.00447275
							TINAGL1	0.900053	3.1695	0.000235364	0.00451004
							CDC42EP3	-0.995642	4.2066	0.000236247	0.00452333
							FBN1	-0.88578	3.96384	0.000240787	0.00460657
							CD24	-0.428621	8.58371	0.000241727	0.00462085
							FAM127A	-1.13178	2.8566	0.000242556	0.004633
							ZNF397	-0.993416	4.30124	0.000244748	0.00467113
							PM20D2	-0.810307	3.97084	0.000248311	0.00473535
							SCPEP1	-0.830978	3.67583	0.000249043	0.00474552
							SNRK	-1.18014	3.30805	0.000250326	0.00476617
							SHISA6	-3.45321	1.09599	0.000251944	0.00479315
							AMN	1.97577	1.75291	0.000252909	0.00480768
							SALL2	-1.18866	3.99487	0.000254225	0.0048287
							GALE	1.21156	3.21109	0.000254419	0.0048287
							PIK3R3	0.912806	5.75319	0.000255324	0.00484203
							IQCG	-0.88984	5.15443	0.000255886	0.00484884
							IKBKAP	0.928262	4.52607	0.000257287	0.00487153
							ATP5G3	0.366532	7.94271	0.00025751	0.00487189
							NELL2	1.6269	3.45667	0.000258353	0.00488398
							LINC00491	2.1604	1.71267	0.000258771	0.00488802
							NES	-1.02141	5.81807	0.000259843	0.00490438
							LPIN2	0.718966	4.97955	0.00026052	0.00491227
							PHYH	1.36853	2.6791	0.000260672	0.00491227
							PPT2	1.64146	1.96021	0.000262979	0.00495184
							SLC39A6	-0.791522	4.45043	0.000263316	0.00495428
							PLA2G10	1.22449	2.36345	0.000266703	0.00501406
							PRDX1	0.31778	9.98717	0.000267838	0.00503069
							MAL2	0.870409	5.56348	0.000268009	0.00503069
							SPG20	-0.792335	5.42491	0.000268712	0.00503993
							RPS14	0.280494	10.723	0.000272884	0.00511417
							TMEM181	1.08474	4.51321	0.000275105	0.00515175
							C19orf69	3.8739	0.63278	0.000276233	0.00516881
							BPGM	-0.935181	5.67515	0.000279527	0.00522555
							RCBTB2	-1.70298	3.11494	0.000279702	0.00522555
							FSCN1	-0.764348	4.60743	0.000280891	0.00524366
							WRB	-0.653916	5.68533	0.000281762	0.00525582
							ZDBF2	-0.758022	4.95275	0.000285943	0.00532798
							RNF150	-2.31983	2.55871	0.000286077	0.00532798
							DCLRE1B	-2.15399	1.90722	0.00028922	0.00538233
							BCAS1	0.933001	3.43438	0.000289584	0.00538491
							DHX30	-0.497149	5.89187	0.000292128	0.00542799
							SDHC	0.595403	6.43421	0.000293276	0.00544509
							CLIC6	1.40687	2.92116	0.000293557	0.00544607
							TRAM1	0.55289	6.16962	0.000296031	0.00548771
							ING4	-0.824511	3.89483	0.000298056	0.00552096
							DHX16	-1.65926	2.08708	0.00029864	0.0055245
							PRKG1	-1.04068	4.24696	0.000298709	0.0055245
							PPP2R2A	0.647783	5.03747	0.000299741	0.0055393
							SCRN3	1.00087	3.51346	0.000301736	0.00557186
							MAATS1	-1.96409	3.14056	0.000305132	0.00563021
							ERP44	0.622133	5.40234	0.000305707	0.00563648
							GART	0.519939	7.85338	0.000308539	0.0056843
							ZNF626	-0.721191	5.68829	0.000311364	0.00573193
							IGFN1	-1.89489	2.04934	0.000311696	0.00573362
							UBE4A	0.477019	6.88265	0.000314152	0.00577435
							LMBRD1	0.552184	6.11101	0.000314829	0.00578234
							NOS3	3.24804	0.959889	0.000315395	0.0057883
							DGKA	1.87166	1.89984	0.00031736	0.0058199
							GAS1	-1.43912	3.13478	0.000317773	0.005823
							HEMGN	1.32815	3.26478	0.000318417	0.00583032
							ZNF627	-1.60698	3.03955	0.000319053	0.0058375
							RNF146	-1.0125	3.01421	0.00031944	0.0058401
							PRRX1	-1.41124	3.33145	0.000319935	0.00584468
							CD47	-0.733489	4.31353	0.000321723	0.00587286
							BEND4	-3.48211	1.92897	0.000322734	0.00588631
							C3orf52	1.71592	3.36102	0.000322953	0.00588631
							TTI1	1.09724	4.34087	0.000324349	0.00590725
							P2RX4	1.84531	2.01157	0.000324696	0.00590908
							PHF6	-0.471586	7.90803	0.0003256	0.00592102
							NHEJ1	1.27803	2.92799	0.000327875	0.00595786
							SERINC2	1.23417	2.57478	0.000331708	0.00602293
							CAMKK2	1.08482	2.99932	0.000333896	0.00605804
							CCNG2	1.03528	3.55733	0.000334596	0.00606614
							VCAM1	-1.44638	4.50776	0.000335064	0.00607001
							TRIM55	-4.68103	0.893764	0.000336226	0.00608646
							PPFIBP1	-0.681704	6.99058	0.000336929	0.00609457
							SPINT2	0.602616	7.17728	0.000337676	0.00610074
							CTSE	0.623178	6.50465	0.000337781	0.00610074
							MAPK1IP1L	-0.35199	7.10225	0.000339047	0.00611898
							SOAT1	-0.675779	4.89879	0.000342832	0.00618262
							PLEKHG6	2.06307	1.32391	0.000343861	0.0061965
							TM9SF3	0.588033	5.91947	0.000345053	0.00621329
							PITPNB	-0.3925	7.25088	0.000346263	0.00623039
							ACAD8	-1.64091	3.4088	0.000352168	0.00633187
							NDUFB3	0.413363	6.20699	0.000352726	0.00633714
							RRS1	1.62012	2.88912	0.000354954	0.00637237
							EVA1B	-1.22637	2.21335	0.000358564	0.00643235
							LAMP2	-0.505261	6.42688	0.000359611	0.00644187
							STYK1	2.31119	2.38057	0.000359634	0.00644187
							LPHN3	-1.14256	4.50854	0.000361358	0.00646789
							ZNF148	-0.592753	5.58823	0.000362971	0.00649192
							TRHDE	-2.3596	1.70976	0.000364879	0.00652115
							KCTD7	-2.0785	1.70421	0.000367596	0.00656481
							MORF4L1	-0.319081	10.8927	0.00036926	0.00658959
							SLC22A23	1.68467	1.77285	0.000374781	0.00668313
							DPP10	2.27102	1.85988	0.000376763	0.0067085
							GPR63	2.10693	2.86477	0.000376765	0.0067085
							ATE1	1.12912	3.76979	0.00037849	0.00673419
							INPP5D	1.92811	1.72168	0.000383705	0.00682191
							THSD7B	-3.93735	0.678197	0.000386249	0.00686202
							COPS8	-0.491538	5.37567	0.000389243	0.00691007
							SCAMP1	0.499451	6.77633	0.000391487	0.00694475
							THBD	2.71912	0.987975	0.000393207	0.00697008
							GSTP1	0.24829	8.31106	0.000393988	0.00697876
							DRAP1	-1.25751	3.02974	0.000397248	0.00703129
							ASUN	0.575065	6.39462	0.000397592	0.00703217
							ZFAS1	0.510243	7.94061	0.000397959	0.00703345
							PCF11	-0.632593	5.80165	0.000398852	0.0070393
							HIGD2A	0.579168	5.62656	0.000398879	0.0070393
							PTPN14	-0.634962	5.36194	0.000400562	0.00706378
							CEBPA	3.43629	0.563397	0.000400926	0.007065
							XKR9	2.07978	2.01175	0.000404935	0.00713038
							HOXD9	-2.17602	1.21668	0.000405649	0.00713769
							BAG4	-0.454399	6.34405	0.000407319	0.00715795
							EFCAB1	-3.71725	0.647147	0.0004074	0.00715795
							COMMD10	-0.449916	6.63986	0.000409383	0.00718752
							RPLP2	0.588077	8.96748	0.000410214	0.00719682
							TPTE2P6	-2.37854	1.512	0.000410794	0.0072017
							GPLD1	-0.915736	3.46268	0.000411386	0.00720679
							NXPE2	4.11677	0.675334	0.000412064	0.00721339
							OSGEPL1	-0.865998	5.26775	0.000412677	0.00721785
							ARHGAP27	3.12192	1.01553	0.000412924	0.00721785
							C14orf132	-1.06453	3.78741	0.000415856	0.00726381
							CD3EAP	0.966488	3.48098	0.000420323	0.00733489
							EIF4G1	0.575802	4.83537	0.000420602	0.00733489
							ANXA10	0.325142	9.27935	0.000420847	0.00733489
							LIN9	0.916949	5.06617	0.000421843	0.00734689
							NT5E	-1.43033	3.10875	0.000423763	0.00737496
							SLC1A1	1.54717	1.74539	0.00042546	0.0073991
							CCNJ	-1.16917	3.67297	0.000427155	0.00742318
							MLLT4	0.591251	5.94759	0.000427653	0.00742643
							KIAA1033	0.638973	5.96553	0.000428892	0.00744254
							RABL6	0.754038	4.43246	0.000431123	0.00747582
							CYP2W1	1.26665	2.11042	0.000431667	0.00747984
							MRPS17	-0.475274	7.45968	0.000436434	0.00755695
							AHSP	0.999284	3.69932	0.000437633	0.00757222
							CHML	0.925915	5.62739	0.000438745	0.00758436
							FTL	0.284216	10.045	0.00043897	0.00758436
							FSIP2	1.00923	4.12383	0.000445303	0.00768481
							AOX1	3.28935	1.46267	0.000445426	0.00768481
							APOH	2.73183	0.817686	0.00044621	0.00769278
							TACC2	1.23131	3.1847	0.000448136	0.00772041
							PIH1D2	-1.38494	3.23915	0.000452184	0.00778454
							RPS15	0.334268	8.63495	0.000453287	0.00779791
							PIFO	-1.45133	3.06242	0.000459366	0.0078968
							RPL32	0.311191	12.6021	0.000460902	0.00791751
							TERF1	-0.492329	10.8192	0.000462582	0.00794066
							FGFR1OP	1.09534	3.80349	0.000464322	0.00796481
							PARPBP	0.719662	6.41606	0.000467897	0.00802037
							CCDC13	-4.14367	1.10346	0.000471574	0.00807761
							SEPT6	-0.707453	5.83418	0.000472522	0.00808805
							PLCB1	-1.06192	4.75332	0.000474949	0.00812378
							EZR	0.395046	8.91042	0.00047531	0.00812414
							FOXF1	1.99374	0.927594	0.000476213	0.00812798
							BAZ2A	0.707448	5.63538	0.000476216	0.00812798
							SPTSSB	2.09289	3.56056	0.000478247	0.00815683
							ZFP57	4.08051	0.755391	0.00048677	0.00829628
							FAM162A	0.432231	7.21269	0.000487358	0.00830036
							JAM3	-0.851277	4.19916	0.000489924	0.00833812
							OCIAD1	0.393199	7.42501	0.000492827	0.00838157
							PTPRD	-0.822457	5.1338	0.000494867	0.00841028
							SP100	0.524255	4.92017	0.000495601	0.00841676
							FSTL5	1.13374	4.78573	0.000501868	0.00851714
							LSAMP	0.795561	4.16412	0.000502373	0.00851965
							TOP1	0.476602	6.53202	0.00050697	0.00859153
							HLA-DMA	0.757998	3.71147	0.00051158	0.0086635
							CGNL1	-0.608037	5.22599	0.000512117	0.00866645
							C5orf38	-3.74705	0.966551	0.000516914	0.00874144
							EEF1A2	-2.12892	0.982989	0.000517748	0.00874936
							ARVCF	-1.337	2.57271	0.000520416	0.00878823
							MRPS33	0.343975	7.24085	0.000521914	0.00880729
							GEMIN2	-0.678907	5.06437	0.000525772	0.00886613
							SMUG1	0.832058	4.18392	0.000529306	0.00891944
							SULT1E1	0.608792	4.92517	0.000530497	0.0089268
							NEIL2	-1.38179	2.71529	0.000530597	0.0089268
							TTC27	-1.23715	3.82288	0.000530863	0.0089268
							DERA	0.786613	4.7395	0.000531369	0.00892902
							OSTF1	1.20583	2.94499	0.000533206	0.00895359
							C11orf96	-1.59849	1.75979	0.000536177	0.00899716
							LEMD1	-1.15589	3.06899	0.000538375	0.0090277
							ST6GALNAC4	-2.98246	1.1319	0.000540026	0.00904282
							GNG12	0.408512	5.95503	0.000540034	0.00904282
							EGR1	-0.536301	5.1061	0.000540987	0.00905245
							LINC00645	-1.69658	2.59734	0.000543049	0.00908059
							SYT11	-1.34804	3.13651	0.000547705	0.00915204
							YAE1D1	0.479581	6.30982	0.000553625	0.00924449
							STK36	-1.62531	2.06473	0.000564772	0.00942378
							RNF34	0.697923	5.30256	0.000565151	0.00942378
							EIF3F	-0.691685	4.60142	0.000568393	0.00946939
							NFE2L3	1.01115	4.28598	0.000568679	0.00946939
							CENPN	0.313398	7.93217	0.000576412	0.00959149
							RABGAP1L	0.512557	6.3822	0.000577194	0.00959781
							TRIM13	-0.454807	6.28522	0.000582617	0.00968125
							CALU	-0.375358	9.16042	0.000584087	0.00969666
							CNOT2	0.357687	8.31365	0.000584356	0.00969666
							CCDC146	-1.36567	4.38133	0.000585516	0.00970409
							MRPL16	0.716903	4.19711	0.000585616	0.00970409
							STOM	0.944678	4.50018	0.000588471	0.0097386
							TMEM107	-1.35014	3.27724	0.000588514	0.0097386
							MMADHC	0.275783	8.08381	0.000594045	0.00982333
							CDA	1.84098	2.05081	0.000595597	0.00984218
							PITPNC1	-1.51774	2.93033	0.000605236	0.00999456
							NEBL	-1.47882	3.61956	0.000606636	0.0100108
							ELF4	2.33189	1.09148	0.000609727	0.0100548
							P2RY14	-2.14344	1.79525	0.000610229	0.0100561
							ELAVL3	2.69343	1.17276	0.000611415	0.0100625
							EYS	3.68474	1.43784	0.000611458	0.0100625
							VIMP	0.665828	5.75367	0.000613538	0.0100898
							ARHGAP28	-0.934788	3.92332	0.000615181	0.0101032
							KIAA1211	-1.17215	3.75026	0.000615195	0.0101032
							PYY	3.52598	0.784936	0.000618906	0.0101571
							ELF3	0.978973	3.51928	0.0006207	0.0101796
							CFL2	-0.677623	5.20019	0.000621457	0.010185
							PARP16	-2.33784	1.92551	0.000637476	0.0104404
							SCML1	1.162	2.82845	0.000639131	0.0104603
							RDH11	0.359578	8.46231	0.000642823	0.0105135
							COL8A1	-1.34365	2.75273	0.000647807	0.0105878
							OAT	0.360815	6.75937	0.000648332	0.0105891
							ZZZ3	-0.871806	4.92223	0.000649889	0.0106018
							GABARAP	-0.221032	9.18865	0.000650375	0.0106018
							IMMP1L	-0.666439	5.54376	0.000650441	0.0106018
							LONRF2	-1.04067	2.47095	0.000651192	0.010604
							BEX1	0.999338	4.04228	0.000651462	0.010604
							UBAP2	0.484205	6.29027	0.000652132	0.0106077
							TUBA1B	0.234244	9.83832	0.000654277	0.0106353
							SP110	-1.0928	2.92593	0.000656353	0.0106618
							GLUL	0.431311	7.12264	0.000657341	0.0106676
							TMEM70	1.52661	3.30743	0.000657938	0.0106676
							ZNF300	3.42048	2.31313	0.000658155	0.0106676
							STRA13	-0.689523	6.05549	0.000658496	0.0106676
							TUBAL3	4.45933	0.756945	0.000659906	0.0106832
							PDS5B	-0.397073	7.52547	0.000661492	0.0106947
							ELAVL4	3.45844	2.06483	0.000661512	0.0106947
							RSL1D1	0.295529	11.2478	0.000666674	0.0107709
							HERC3	-2.15319	1.3755	0.000668038	0.0107857
							DCC	-3.44048	1.06055	0.000668989	0.0107937
							LRRC49	-0.927355	5.5898	0.000670301	0.0108076
							COX4I1	0.31189	8.31263	0.00067081	0.0108085
							TM4SF1	0.615092	9.29957	0.000673725	0.0108482
							FAM184A	-1.36803	3.36566	0.0006746	0.0108549
							CEP97	-0.770387	4.45694	0.000677726	0.0108979
							MFSD11	0.564173	5.18307	0.000682752	0.0109713
							PARP1	-0.428221	6.46742	0.000684961	0.0109994
							ALDH2	1.0041	4.04003	0.000686294	0.0110134
							TUBB6	-1.1635	3.35022	0.00069008	0.0110668
							DCDC1	-2.71548	2.13992	0.000694169	0.0111249
							SDC2	-0.621738	5.04935	0.00069523	0.0111344
							PIK3AP1	-1.9598	2.42657	0.000696228	0.0111429
							SLC36A1	1.88714	1.76137	0.000696696	0.0111429
							SPATA4	-3.26316	1.00785	0.000697419	0.011147
							CNTN1	-2.61225	1.82536	0.000698576	0.0111581
							GATC	0.682477	4.53378	0.000699338	0.0111628
							C3orf17	-0.901996	4.54138	0.000701687	0.01119
							SPAG16	-0.861059	3.92029	0.000701978	0.01119
							NPHS2	-3.67495	0.589496	0.000705012	0.0112264
							HSCB	-0.737181	4.69059	0.000705494	0.0112264
							MAB21L2	3.11088	1.49259	0.000705673	0.0112264
							ENPP3	-2.50391	1.32614	0.000710711	0.011299
							SLC22A3	2.56874	1.2916	0.000712942	0.011327
							DESI2	-0.977629	3.62962	0.000720959	0.0114457
							TACC3	-1.35551	3.32492	0.000721372	0.0114457
							ZNF791	-1.06501	3.64807	0.000726272	0.0115158
							CD2AP	0.468969	6.88934	0.000731706	0.0115942
							LMAN2	0.549557	5.46633	0.000732992	0.0116069
							SMLR1	3.57821	1.42442	0.000739861	0.0117079
							GAS6	1.98788	1.26834	0.000741302	0.011723
							ATP2B4	-0.791837	4.83969	0.000748278	0.0118255
							IFT52	-0.589748	5.55743	0.000753096	0.0118937
							TRIB3	1.61566	1.46557	0.000753849	0.0118978
							CASP5	4.13379	0.695798	0.000754403	0.0118987
							LECT1	-1.04231	5.90518	0.000770709	0.0121478
							CDH9	-3.04312	1.95813	0.000772148	0.0121613
							ANP32A	-0.491205	6.56178	0.000772581	0.0121613
							SCRG1	1.13328	2.61913	0.000775525	0.0121996
							PLXNC1	-1.56852	3.11697	0.000787027	0.0123669
							EFHC2	-2.89596	1.59478	0.000787194	0.0123669
							ICAM1	-1.91412	2.41383	0.00078789	0.0123697
							HHLA2	1.90869	1.73143	0.000792326	0.0124311
							RBM45	1.62357	2.3357	0.000796271	0.0124807
							CCDC173	-2.04998	3.41744	0.000796529	0.0124807
							TMEM41B	0.468266	5.68615	0.00079915	0.0125072
							POLR3K	-0.727932	4.57396	0.000799268	0.0125072
							BLCAP	1.14282	3.53399	0.000801168	0.0125287
							C6orf15	2.94027	0.931403	0.000805842	0.0125936
							NR3C2	-2.18754	1.64074	0.000807942	0.0126172
							NDRG4	-2.54419	1.76755	0.000808409	0.0126172
							GNAS	-0.399801	9.8294	0.000810405	0.0126401
							PKP2	1.01309	4.18595	0.000817403	0.0127337
							PLEKHH2	-1.06766	4.44576	0.000817471	0.0127337
							MTR	-0.72098	4.81069	0.000818627	0.0127434
							SRPK1	0.375238	8.78162	0.000824384	0.0128246
							IGF2BP1	0.473073	6.14978	0.000828043	0.0128732
							HUS1	0.736843	4.57488	0.000831243	0.0129145
							UNC13A	2.3058	1.71644	0.000833449	0.0129404
							PWP1	0.605236	5.67784	0.000838603	0.013012
							RBM11	-2.42983	2.17225	0.000842857	0.0130695
							IGFBP3	1.40472	2.23493	0.000844321	0.0130837
							RPL19	0.449264	9.27842	0.000849004	0.0131477
							UBXN2B	-0.584268	5.24488	0.000849616	0.0131487
							KIF16B	0.850452	5.01634	0.000857724	0.0132656
							TTC26	-1.05896	4.42202	0.000861395	0.0133137
							NPL	1.09607	3.38977	0.000867575	0.0134006
							TBK1	0.650668	5.28349	0.000868644	0.0134084
							PPP1R1A	-1.63952	2.34707	0.000878275	0.0135476
							FRMD6-AS2	3.76546	0.598581	0.000878793	0.0135476
							MEIS1	-1.20307	3.35216	0.000881666	0.0135781
							CPEB2	-1.83459	1.72463	0.000881908	0.0135781
							SPTBN1	0.333669	7.18981	0.000886652	0.0136423
							PAICS	0.288489	9.55689	0.00088954	0.0136754
							UNG	0.972183	4.03917	0.000889946	0.0136754
							C19orf77	0.939389	3.70768	0.000892277	0.0137024
							CAPN6	-1.1883	3.06255	0.000898611	0.0137908
							COMT	1.07754	2.74664	0.000899212	0.0137912
							MNF1	-0.503268	7.12442	0.000906666	0.0138966
							DEPDC1	0.632643	5.87157	0.000907904	0.0139066
							COX7C	0.254373	9.78064	0.000909545	0.0139227
							DKK4	4.28694	0.71548	0.000910233	0.0139227
							DARS2	0.991454	4.88791	0.000910703	0.0139227
							RASSF3	0.738165	4.74291	0.000912266	0.0139377
							UBE2H	-0.626501	6.05898	0.000914681	0.0139657
							ZC3H13	-0.312939	7.8128	0.000919443	0.0140294
							VKORC1	-0.763539	4.202	0.000922102	0.014061
							MYB	2.44192	1.46085	0.000925873	0.0141095
							RPL5	0.221924	11.0719	0.000933859	0.0142222
							GATAD2B	-0.73617	3.88118	0.000938718	0.014287
							SNRNP25	-1.15298	3.45811	0.000941799	0.0143248
							MSMO1	0.314383	10.3892	0.000944311	0.0143539
							ZNF398	-1.00777	3.53525	0.000947791	0.0143976
							EXTL2	-0.403265	7.1507	0.000951908	0.014451
							CLIC5	1.83162	2.3929	0.000953749	0.0144697
							ME1	1.68293	2.95258	0.00096495	0.0146263
							TTL	-0.858364	3.9726	0.000965291	0.0146263
							CALCRL	-1.18912	4.35467	0.000966428	0.0146342
							MKI67	0.51101	6.51474	0.000967072	0.0146347
							DCP2	-0.416223	6.97034	0.000972085	0.0147013
							ARG1	2.30547	0.900434	0.000973365	0.0147113
							CAMSAP1	-1.14021	3.32037	0.000979125	0.014789
							JUN	-0.839583	3.76849	0.000982125	0.0148249
							CKLF	-0.717329	4.16733	0.000983491	0.0148362
							C1QTNF3	-1.18099	3.4991	0.000994698	0.0149938
							CD97	1.7987	1.26795	0.000995195	0.0149938
							FTO	-0.675779	5.04514	0.000998557	0.015035
							HDAC4	-2.03235	1.75577	0.00100102	0.0150626
							ASCC3	0.623128	5.80532	0.00100501	0.0151132
							GPR176	-2.65223	2.342	0.00101354	0.0152318
							ATP10A	3.65018	0.753936	0.00101691	0.0152728
							FAF1	-1.15153	3.48919	0.00103336	0.0155101
							GLRA2	-3.24521	1.01634	0.0010447	0.0156705
							C14orf2	0.259167	9.07012	0.00105346	0.015792
							LAMB1	-0.513028	7.18998	0.00105463	0.0157933
							CEP72	-3.14253	1.69073	0.00105487	0.0157933
							FBXW4	-1.42721	2.25681	0.00105802	0.0158306
							CARD16	1.67086	1.4252	0.00106404	0.0159106
							PAK1	0.583813	5.67679	0.00106506	0.0159159
							USP14	0.607672	5.00912	0.00106979	0.0159767
							TMPRSS4	1.07685	3.02486	0.00107115	0.015987
							EIF2S2	0.338223	8.10549	0.00107382	0.0160168
							MARC1	1.60423	3.33112	0.00107505	0.0160252
							RFPL4B	-4.21841	0.801333	0.00107788	0.0160574
							PDLIM5	0.515729	5.85985	0.00108709	0.0161844
							PDE7B	-1.5475	2.12104	0.00108987	0.0162158
							RNASE1	-0.424352	7.11631	0.00109328	0.0162563
							CLEC7A	-0.892899	3.33119	0.00109501	0.016272
							PDGFRL	-1.14979	4.20618	0.00109709	0.0162927
							C20orf194	-1.48987	2.14633	0.00110011	0.0163274
							TPRKB	0.428404	9.01972	0.00110282	0.0163575
							EXOSC2	0.626435	5.99056	0.00110487	0.0163778
							NDUFS2	0.576337	5.109	0.00110612	0.0163836
							IRS1	0.984254	3.60838	0.00110664	0.0163836
							TTC18	-1.96324	2.56713	0.00110749	0.0163861
							PRSS8	0.735331	4.48245	0.00111642	0.0165079
							UBC	0.317672	10.9206	0.00112152	0.0165731
							RPS7	0.271557	11.3476	0.0011229	0.0165833
							AEBP1	-1.23449	1.86292	0.00112499	0.0166039
							DNM2	1.65719	1.45538	0.00113374	0.0167227
							XPNPEP2	3.82327	0.622689	0.00113818	0.0167778
							FAM198B	0.929451	2.71	0.00113902	0.0167799
							AKR7A2	0.551354	4.24713	0.00114431	0.0168474
							GOLT1B	0.398253	7.17804	0.00115325	0.0169685
							HOXC10	1.79373	1.81516	0.00115475	0.0169802
							TMEM238	1.925	0.837005	0.00115618	0.0169907
							ABHD2	0.955877	3.83546	0.00116562	0.0171131
							MYBPC2	3.29522	0.808378	0.00116594	0.0171131
							RPL23A	0.374711	9.01481	0.00117116	0.0171792
							TMEM98	-0.570961	5.2204	0.00117521	0.017228
							RPL37	0.274677	10.9057	0.00118085	0.0173001
							ENPP1	0.665579	4.41404	0.00118413	0.0173309
							SIM2	-1.45148	2.83662	0.00118441	0.0173309
							FGF13	-1.36682	3.10815	0.00118712	0.0173595
							FRG1B	-0.636374	4.58882	0.00118781	0.0173595
							NKX6-2	-3.25784	0.700103	0.00119262	0.0174191
							GGCT	0.444261	6.54783	0.00120576	0.0175917
							COA5	-0.843056	3.85367	0.00120591	0.0175917
							SLC4A5	0.850428	4.09021	0.00121638	0.0177336
							IKZF4	1.31041	2.38908	0.00122056	0.0177837
							ABCA8	-3.48115	0.982169	0.00122186	0.0177918
							MGA	-0.491604	6.34069	0.00122275	0.0177939
							CPN1	3.47531	0.702155	0.00122595	0.0178296
							WSCD1	-1.50091	2.53735	0.00123251	0.0179064
							TACC1	0.760351	4.39026	0.00123273	0.0179064
							ETV3	2.61805	1.28915	0.00123663	0.0179521
							RABEP1	-0.570306	5.06788	0.00124088	0.0180029
							ALS2	-0.667067	5.25956	0.00124805	0.0180959
							ARNT2	-1.37355	2.83714	0.00125377	0.0181679
							TADA1	-0.798534	4.95592	0.00125682	0.0181985
							ARMC8	-0.397179	6.56256	0.0012574	0.0181985
							MYO3A	1.99068	2.47255	0.00125979	0.0182219
							BICC1	-1.47514	2.65405	0.00126116	0.0182308
							AGTRAP	-1.26819	2.94431	0.00126642	0.0182935
							ZFP36L1	-0.500078	6.24833	0.00126703	0.0182935
							TXNL4A	-0.825369	4.26416	0.00127527	0.0184013
							RHOBTB1	-1.32107	3.36388	0.00127739	0.0184207
							NPY1R	-1.09245	3.57224	0.00128147	0.0184685
							PRKAA1	0.570285	5.77592	0.00128227	0.0184689
							LIN7A	-1.61059	2.40722	0.00128431	0.0184833
							WBP11	0.456475	6.92854	0.00128482	0.0184833
							FXYD6	-1.02689	3.11593	0.00128641	0.0184923
							KLHL41	-2.3908	1.60135	0.00128699	0.0184923
							TEX9	-0.566766	6.00652	0.00128935	0.0185151
							CEP89	-0.626762	5.64911	0.00129477	0.0185817
							HOXD4	-2.62758	0.787549	0.00130068	0.0186553
							PIGR	1.13857	2.63622	0.00130246	0.0186618
							SMPDL3A	1.87168	1.6488	0.00130269	0.0186618
							BCL2L15	0.647955	4.28545	0.00131606	0.0188419
							ZNF709	-1.07958	3.46637	0.00131886	0.0188708
							CEP57	-0.515705	6.77571	0.00132546	0.0189497
							NUMB	0.677377	4.94635	0.00132597	0.0189497
							GPR19	1.4471	5.51701	0.00133036	0.0190012
							OMD	-2.47014	1.12017	0.00135023	0.0192734
							CHODL	1.5721	2.62872	0.00135352	0.0193089
							ICAM3	2.26089	1.89168	0.00135632	0.0193372
							RPL39	0.318466	10.5141	0.0013758	0.0196032
							SAMSN1	1.83488	1.73568	0.00139056	0.0198018
							SP6	3.12827	0.765816	0.00139621	0.0198704
							ZFP69B	2.23921	2.10759	0.00139973	0.0199087
							KCTD9	0.719694	4.57263	0.00140603	0.0199863
							C4orf21	-0.825148	5.36345	0.00140826	0.0200046
							STK32B	-2.99246	1.67261	0.00140899	0.0200046
							LRRTM3	3.54225	1.93004	0.0014134	0.0200553
							C1QBP	0.749819	5.06825	0.00141432	0.0200565
							RPS13	0.289527	11.9077	0.0014239	0.0201804
							EHF	0.759826	5.0541	0.00143638	0.0203428
							CTPS1	-0.914002	4.65607	0.00143707	0.0203428
							CLDN14	-4.31513	0.608556	0.00144519	0.0204458
							PDGFC	-0.688633	4.38237	0.0014462	0.0204479
							MOK	-1.21605	3.03735	0.00144955	0.0204831
							PGAM1	0.816654	3.34491	0.00145132	0.020496
							NEK9	-2.27368	2.056	0.00145779	0.0205753
							COX5B	0.377452	6.41511	0.00145882	0.0205776
							SNHG17	1.47958	3.19817	0.00147295	0.0207647
							CCDC147	-3.2939	1.73177	0.00148418	0.0209106
							FDFT1	0.283551	7.51011	0.00148969	0.0209759
							NCAPG2	0.662174	5.47796	0.0014949	0.0210361
							PSMA4	0.183579	10.3453	0.00149573	0.0210361
							RPS3	0.387906	8.89868	0.00149985	0.0210716
							SF3B2	-0.405208	5.92148	0.00150001	0.0210716
							CCDC59	0.598539	6.0591	0.00150866	0.0211807
							DCAF7	-0.493422	5.3101	0.00151878	0.0213101
							AUTS2	-0.720642	4.668	0.00152237	0.021348
							NCEH1	1.37904	3.37512	0.0015323	0.0214746
							TGFB3	-1.04552	3.21995	0.00153407	0.0214869
							FDX1	1.08205	3.10575	0.00154202	0.0215775
							SMS	-0.413423	6.60054	0.00154235	0.0215775
							CLINT1	0.534069	6.11409	0.00154484	0.0215901
							CCL7	-2.26355	0.931159	0.00154505	0.0215901
							DDB2	1.20771	2.69787	0.00154906	0.0216334
							ZNF708	-0.634764	6.01882	0.00155118	0.0216504
							GLI3	-0.767489	4.61777	0.00155283	0.0216608
							MDK	-0.48401	5.48528	0.00155501	0.0216786
							STEAP1	1.16133	3.81786	0.00156474	0.0218015
							RBBP5	-0.480695	5.04213	0.00156598	0.0218018
							TSC22D1	-0.594184	6.04663	0.00156659	0.0218018
							FAM120A	0.728925	4.18959	0.00157375	0.0218879
							LDHB	0.267153	11.6929	0.00157461	0.0218879
							UGDH	0.391658	6.54009	0.00157573	0.0218908
							GPX7	-1.20133	4.02254	0.00157836	0.0218931
							TNK2	1.95275	1.76904	0.0015785	0.0218931
							NOTCH2	-0.984038	5.38052	0.00157865	0.0218931
							MAF	-0.625283	5.19247	0.00158484	0.0219662
							THBS3	-2.05679	1.55242	0.00158695	0.0219822
							NPNT	1.25011	2.89713	0.00158857	0.0219822
							LYG2	3.37167	1.13647	0.00158875	0.0219822
							DOK5	-2.14461	1.77166	0.00159971	0.0221158
							EGFL7	-1.23803	2.52195	0.00160026	0.0221158
							CPNE3	-0.314145	7.73807	0.00160447	0.0221612
							SFR1	0.532564	6.35354	0.00161158	0.0222462
							BRI3BP	1.814	1.5376	0.00161249	0.0222462
							GSTK1	0.775898	4.52456	0.00161453	0.0222615
							NRG4	1.49235	2.39097	0.00162031	0.0223283
							AMOTL1	-0.743548	4.36417	0.00163788	0.0225574
							MRPS18B	0.690683	4.55826	0.00164903	0.0226979
							CSTF2T	-0.731419	4.94896	0.00165178	0.0227227
							SULT1C2	-0.574672	4.66927	0.00165434	0.0227448
							COX8A	0.42483	5.86163	0.00165611	0.022756
							NCK1	0.741161	4.29281	0.00165756	0.0227628
							WDR67	-1.16351	4.23907	0.00166226	0.0228144
							ZBED1	0.68349	4.81348	0.00166437	0.0228301
							ANKRD20A12P	2.72797	1.10793	0.00168116	0.0230472
							RLN1	-3.63664	1.30466	0.00168361	0.0230676
							LIMS1	-0.428152	6.2589	0.00168481	0.0230708
							THEM4	0.83319	3.99643	0.00169211	0.0231575
							SCARB1	1.28877	2.37027	0.00169497	0.0231721
							KLK1	1.74186	1.68973	0.00169512	0.0231721
							ATRNL1	-2.61157	1.87799	0.00170518	0.0232963
							VAV3	-0.927055	4.64471	0.00171264	0.0233849
							LPGAT1	0.710106	5.28979	0.00171641	0.0234122
							MICAL2	2.29459	1.14296	0.0017166	0.0234122
							LRRC37BP1	-0.765318	3.93068	0.00173499	0.0236496
							GBP2	0.693908	4.02258	0.00173926	0.023683
							NGFR	-1.28889	1.79756	0.00173943	0.023683
							ARL2	-0.746808	5	0.00174247	0.0237062
							NPM1	0.270351	10.7823	0.00174311	0.0237062
							GNPTAB	0.606742	5.06523	0.00174706	0.0237463
							OLR1	3.92647	0.842984	0.0017553	0.0238448
							PTAR1	-0.620777	5.10985	0.0017674	0.0239955
							CPS1	1.68284	2.40999	0.00177159	0.0240386
							CARD6	-0.88486	3.51264	0.00178269	0.0241651
							CLEC2B	1.04325	3.74244	0.0017839	0.0241651
							LOC100505761	-1.14944	3.6445	0.00178394	0.0241651
							CDCA8	0.676784	4.88235	0.00178551	0.0241726
							SEMA4G	1.37336	2.47775	0.00179352	0.0242673
							CASP6	0.606341	5.39923	0.00179638	0.0242923
							ZCCHC17	-0.311053	8.1998	0.00180053	0.0243255
							CASK	0.432837	5.51607	0.00180087	0.0243255
							PPM1H	-0.951531	3.48736	0.00180964	0.0244302
							C7orf73	-0.406096	7.14618	0.00181551	0.0244956
							MAPRE2	0.876543	4.98997	0.00182128	0.0245595
							PSPH	0.681179	4.11271	0.00182473	0.0245922
							GDI2	-0.300197	7.66181	0.00182632	0.0245997
							ARMCX1	-1.38741	3.38825	0.00183442	0.0246949
							CA4	-3.08785	0.763697	0.00183695	0.024715
							ZNF829	0.967742	3.37218	0.00183863	0.0247238
							BBS9	1.18414	3.74569	0.00184813	0.0248375
							ACYP1	-0.927199	3.97213	0.00185547	0.0249222
							ABCB1	1.61534	2.55582	0.00186766	0.0250718
							CAMK2N1	0.75384	4.33444	0.00187149	0.0251091
							SPAG17	-1.65226	3.3626	0.00187587	0.0251519
							CHCHD4	0.937163	4.62433	0.00187679	0.0251519
							LRRK2	-3.4502	1.10869	0.00189746	0.0254147
							PALM2	-1.33199	2.69461	0.0019191	0.0256824
							FZD7	-0.832505	4.19727	0.0019196	0.0256824
							HABP4	-1.89596	2.04727	0.00193119	0.0258231
							ADIPOR2	0.923459	4.91397	0.00194654	0.0260138
							NCLN	1.1442	2.87815	0.00195182	0.0260622
							LOC100379224	2.75236	1.50097	0.00195304	0.0260622
							KLF4	1.33427	1.48666	0.00195344	0.0260622
							PIP5K1B	2.05972	1.76357	0.00195504	0.0260691
							UFSP2	-0.606064	5.26291	0.00195763	0.0260891
							NR0B2	1.22443	2.60433	0.00195912	0.0260943
							GUCA2B	3.14491	0.746719	0.00196309	0.0261325
							TRIT1	-1.11833	3.17782	0.00196624	0.0261599
							NME5	-0.827722	4.74954	0.00197285	0.0262334
							STRAP	0.498341	6.65979	0.0019776	0.0262818
							PIK3C2G	-0.609362	4.07362	0.00197945	0.0262918
							PPIA	0.282311	10.8748	0.00198658	0.0263574
							HADHA	0.367096	8.51549	0.00198659	0.0263574
							SERPINB11	-4.39627	0.80274	0.00198829	0.0263653
							RPGRIP1L	-0.585686	6.16284	0.00199786	0.0264775
							SLC7A8	-1.00055	5.40966	0.00200389	0.0265427
							C11orf93	3.29573	0.688908	0.0020151	0.026662
							LHX8	4.05445	0.632675	0.00201683	0.026662
							TCL6	-3.45589	0.581411	0.0020169	0.026662
							C6orf52	-1.07402	3.91183	0.00201736	0.026662
							COL4A5	-1.08793	3.34769	0.00204478	0.0270094
							PLIN3	0.487039	5.42617	0.00204837	0.027035
							LOC440894	3.7331	0.585428	0.00204898	0.027035
							FXYD5	0.91319	3.54442	0.00206706	0.0272455
							GPR137C	-1.81777	2.26296	0.00206721	0.0272455
							HSPA4L	1.11513	3.3519	0.00207008	0.0272683
							FAM83E	2.67877	0.81064	0.0020757	0.0273272
							PLK2	-0.995652	4.98442	0.00209262	0.0275347
							GNG12-AS1	2.85846	1.15713	0.00209842	0.0275959
							BTN2A2	-0.925133	3.69636	0.00210301	0.027641
							BCAP31	0.346244	7.02611	0.00210719	0.0276807
							FUS	0.397301	5.18231	0.00211125	0.027694
							CHRM3	2.35663	1.50396	0.00211165	0.027694
							PDZD3	3.76166	0.621756	0.00211167	0.027694
							ZBTB8OS	0.377238	7.08891	0.00211296	0.0276956
							RIMBP2	-3.79087	0.833282	0.00211502	0.0277074
							RCN1	-0.531169	5.238	0.00212376	0.0278068
							NAV2	-0.70098	4.74795	0.00213141	0.0278916
							PRG3	1.61482	1.87446	0.0021405	0.0279952
							MNDA	2.10302	1.74645	0.00215069	0.0281131
							EED	0.710798	4.77223	0.00215304	0.0281284
							DPCR1	-2.2085	2.32958	0.00215629	0.0281527
							AGTR2	-3.00128	1.20478	0.00215725	0.0281527
							PSD3	-0.785513	4.77944	0.00216132	0.0281904
							ZNF521	-0.818665	4.58977	0.00216596	0.0282331
							C6orf118	-3.76373	1.19	0.00216696	0.0282331
							SPTA1	1.59585	1.65793	0.00217481	0.0283199
							POLR1B	1.06371	3.71384	0.00218761	0.0284573
							TMEM215	2.79511	1.3647	0.00218774	0.0284573
							ZBTB18	-1.74082	2.58676	0.00218916	0.0284603
							C1GALT1	0.490608	5.54077	0.00219745	0.0285386
							SOD1	-0.459053	6.58988	0.00219757	0.0285386
							CTSS	0.676115	3.82435	0.00221441	0.0287416
							PER3	-2.07816	2.24356	0.00221926	0.028789
							ARPP19	-0.327698	6.51942	0.00222476	0.0288447
							C1orf192	-1.63756	2.36748	0.002241	0.0290394
							MKL1	-2.21688	1.09441	0.00224314	0.0290514
							DEAF1	-1.43494	2.04479	0.00224641	0.029078
							ITGAE	0.469633	6.28731	0.00226245	0.0292698
							PDSS1	2.0737	2.1239	0.00226712	0.0293143
							PODXL	-0.958727	5.69252	0.00226911	0.0293181
							DLX6	-3.97573	0.761295	0.00227039	0.0293181
							LINC00470	1.30179	2.205	0.0022711	0.0293181
							HDHD2	0.79622	4.17492	0.00227662	0.0293735
							NGDN	-0.351507	6.9147	0.00228058	0.0294088
							PPP1R9A	-0.404573	6.38315	0.00228882	0.029499
							HNF4G	2.62513	1.27678	0.00229391	0.0295488
							CA12	0.943667	4.05722	0.0023069	0.0296576
							CCDC124	-1.45084	2.38818	0.00230718	0.0296576
							TCEAL2	-1.98663	2.87457	0.00230859	0.0296576
							PPM1N	2.03543	2.19336	0.00230917	0.0296576
							CD99	-0.64904	4.6866	0.00231006	0.0296576
							RAB37	2.11184	1.38991	0.00231053	0.0296576
							ZDHHC2	-0.650402	3.93289	0.00231105	0.0296576
							FAM155A	-1.74726	2.65225	0.00231692	0.0297171
							ELF5	1.69227	2.08642	0.00232119	0.0297558
							MSR1	1.84426	1.79346	0.00233562	0.0299247
							FBN3	-2.13876	1.25312	0.00233892	0.0299391
							BMP2	-1.03121	3.99503	0.00233925	0.0299391
							CAPSL	-2.23348	2.56014	0.00234126	0.0299489
							LYPLA1	0.487075	6.01076	0.00235524	0.0301116
							RILPL2	-1.60294	2.11322	0.00235891	0.0301423
							C3orf67	2.06298	2.14126	0.00236135	0.0301574
							TNF	-3.78428	0.618552	0.00236689	0.030212
							FKBP9L	-1.72972	1.70828	0.00237237	0.0302455
							CROT	0.726354	5.40228	0.00237245	0.0302455
							COPG2	-1.06879	3.79488	0.00237331	0.0302455
							CT45A5	-3.435	0.700254	0.00237466	0.0302465
							PLK1S1	-1.17411	4.05617	0.00238786	0.0303985
							KLRAP1	2.9688	1.51273	0.00239479	0.0304704
							CHST2	-2.07535	1.51236	0.00239639	0.0304745
							SEMA5A	-0.79695	4.04385	0.00240241	0.0305349
							INTU	-0.541458	5.98754	0.00240641	0.0305695
							MOB3B	-0.848873	4.07328	0.00241344	0.0306295
							POLR3B	0.94583	4.3266	0.0024149	0.0306295
							CADM3	3.27967	0.871729	0.00241498	0.0306295
							POLE	-1.55621	2.4838	0.00244439	0.0309861
							XPO5	-0.731138	4.64797	0.00244731	0.0310057
							UNC13C	1.2281	2.18543	0.00245002	0.0310057
							REN	3.05084	0.727595	0.00245029	0.0310057
							SLC44A5	1.5158	2.01048	0.00245113	0.0310057
							LGI2	-1.82458	2.12254	0.00246335	0.0311438
							PA2G4	0.554863	5.56329	0.00246626	0.0311641
							ZNF404	3.24207	0.945423	0.00247463	0.0312533
							ONECUT2	-0.963382	3.98145	0.00247993	0.031291
							ADAM3A	4.12311	0.759167	0.00248023	0.031291
							AIFM1	-0.524172	5.3918	0.00248915	0.031374
							LOC339803	-0.617079	5.09598	0.0024905	0.031374
							PLEKHH1	1.05496	3.01353	0.00249075	0.031374
							STX7	0.726243	5.09558	0.00250104	0.031487
							MDH2	0.551568	6.16305	0.00250475	0.0315171
							GRHPR	-0.889864	3.94027	0.00250862	0.0315491
							RPL37A	0.276686	10.2853	0.00252224	0.0317037
							TAOK3	0.844043	4.70888	0.00252669	0.031743
							DCUN1D4	-0.564963	5.51419	0.00253145	0.0317703
							GSTCD	-0.720434	4.5031	0.00253152	0.0317703
							MS4A8	2.57883	0.780523	0.00253741	0.0318275
							DPY19L2	-2.59414	1.12562	0.00253905	0.0318313
							NDUFS5	0.267838	10.2382	0.00254182	0.0318368
							CCNE2	1.18601	2.98989	0.00254214	0.0318368
							CNGA1	1.35339	3.72003	0.00254396	0.0318428
							DDX24	-0.261488	9.71282	0.00254646	0.0318575
							LINC00672	0.913882	3.78736	0.00255159	0.0319049
							SPRED1	0.549105	5.51832	0.00256262	0.0320261
							LOC100505875	-1.09747	2.98271	0.00256679	0.0320613
							TSGA10	-1.32565	3.24633	0.00256812	0.0320613
							H2AFJ	0.783859	4.23513	0.00257569	0.032139
							DNAJC11	0.754404	4.21497	0.00258894	0.0322875
							AFF2	-2.30214	1.93765	0.00259767	0.0323663
							CMAS	0.834881	3.8416	0.00259989	0.0323663
							H2AFY2	-0.956234	4.04775	0.00260034	0.0323663
							MTX3	-0.65465	5.27366	0.00260068	0.0323663
							B3GNT7	1.02092	4.24659	0.00261077	0.0324749
							AHNAK2	-1.08639	2.59707	0.00262478	0.0326322
							XK	2.24779	0.906954	0.00262974	0.0326632
							LINC00649	1.29814	2.78427	0.00263001	0.0326632
							ZNF92	-0.587333	5.88781	0.00263379	0.0326932
							RNF181	0.270079	8.22744	0.00263616	0.0327057
							FAM177A1	0.701223	4.40879	0.00263974	0.0327331
							TBC1D19	-2.08641	2.32757	0.00264604	0.0327942
							FILIP1L	0.695332	4.26001	0.00268304	0.0332355
							SNRPB	0.633756	5.21038	0.00268965	0.0333001
							MRPL13	0.28262	7.9228	0.00271305	0.0335724
							UHRF1BP1L	1.20862	3.83593	0.00273018	0.0337669
							CD99L2	-2.9896	1.2248	0.00273309	0.0337853
							ZNF415	-0.750834	4.13428	0.00273501	0.0337917
							AGT	3.04265	0.840449	0.00273733	0.0337966
							OLFML3	-0.899191	4.11793	0.00273992	0.0337966
							CPPED1	0.670633	4.29105	0.00274023	0.0337966
							ST8SIA4	-0.795305	3.28273	0.00274147	0.0337966
							PCSK9	1.27186	3.26514	0.00274248	0.0337966
							FBP1	2.15554	1.41574	0.00277295	0.034137
							BAAT	1.8788	2.60287	0.00277324	0.034137
							NOL12	0.821463	4.05251	0.00277439	0.034137
							SEZ6L2	1.45743	2.2132	0.00278815	0.0342887
							SQSTM1	0.815923	3.88813	0.00279624	0.0343704
							ZNF280A	3.37124	2.02123	0.00280182	0.0344213
							DYNLT1	-0.253533	8.28026	0.0028065	0.0344612
							METAP2	0.298383	7.12356	0.00281192	0.0344941
							NCKAP5L	2.39427	0.917728	0.00281207	0.0344941
							RPL7	0.232958	12.7044	0.00281596	0.0345118
							ASCL1	2.72511	1.30775	0.0028164	0.0345118
							OSBPL2	0.423433	5.15139	0.00281811	0.034515
							COG3	-1.08218	2.91605	0.00283004	0.0346433
							APBB1IP	2.93023	0.671185	0.002836	0.0346986
							DENR	0.397898	6.94001	0.00285009	0.0348492
							PLP1	-0.82224	5.41898	0.00285123	0.0348492
							SEPT10	0.851087	4.37834	0.00285683	0.0348998
							RPS29	0.309715	10.6586	0.00288109	0.0351781
							TAOK1	-0.427599	6.4622	0.00288574	0.0352169
							ITIH5	-0.549213	4.25005	0.00289602	0.0353109
							MRPL35	0.298289	6.71964	0.00289778	0.0353109
							GATSL3	-2.35911	1.48555	0.00289829	0.0353109
							PTPLAD1	-0.323478	8.50556	0.00289935	0.0353109
							TINAG	0.653124	3.72562	0.00290279	0.0353348
							KLF7	-0.880066	4.45551	0.00292632	0.0356031
							FDXR	1.86074	1.45453	0.00293596	0.0357022
							HPS5	-0.814137	4.81284	0.00295003	0.0358373
							MUC16	3.75281	0.598122	0.00295007	0.0358373
							POLK	-0.683902	5.21977	0.00295303	0.035855
							UBXN4	0.291961	7.91948	0.00295504	0.0358612
							MCFD2	0.369948	6.40529	0.00296421	0.0359238
							TOMM7	0.224772	8.64692	0.00296572	0.0359238
							JPH1	1.92474	2.4631	0.00296587	0.0359238
							LOC100506844	-0.518389	5.53074	0.00296633	0.0359238
							KIAA0020	0.274803	9.48074	0.00296772	0.0359238
							BTBD10	0.542477	5.69867	0.00302533	0.0366027
							ZDHHC23	-2.83023	1.28185	0.00303604	0.0367037
							SEPT3	-2.18131	2.13281	0.00303676	0.0367037
							ISYNA1	-0.965521	3.48675	0.00305329	0.036885
							PPIL4	-0.358005	8.62867	0.00307851	0.0371708
							TRPS1	-1.00447	4.65161	0.00308159	0.0371892
							CCDC138	-0.695754	6.45956	0.00309181	0.0372937
							DHFR	0.315586	7.51426	0.00309595	0.0373248
							C9orf123	-0.626221	4.3601	0.00309779	0.0373282
							NDFIP2	0.693504	4.32528	0.00310319	0.0373741
							ITM2A	-0.963637	4.16666	0.00310473	0.0373741
							PLA1A	-2.57967	0.557695	0.0031102	0.0374051
							PIGP	0.495588	5.67164	0.00311044	0.0374051
							BMF	-2.15534	0.956894	0.0031194	0.0374939
							NMNAT2	1.81382	2.08207	0.00313498	0.0376533
							RNF38	-0.88974	4.40088	0.00313581	0.0376533
							ANKRD18B	2.0443	2.70828	0.00313756	0.0376554
							PLSCR4	1.23679	2.37136	0.00314229	0.0376933
							GJB7	3.08724	2.61097	0.00314745	0.0377362
							ACADVL	0.795272	3.5965	0.00315215	0.0377379
							METTL7B	1.66582	2.4399	0.00315263	0.0377379
							ANAPC5	0.574642	5.18161	0.00315343	0.0377379
[truncated: 129 more rows]
